1 **The PELOTA-HBS1 Complex Orchestrates mRNA Translation Surveillance and**  
2 **PDK1-mediated Plant Growth and Development**

3

4 Wei Kong<sup>1,#</sup>, Shutang Tan<sup>2,3,#</sup>, Qing Zhao<sup>1</sup>, De-Li Lin<sup>4</sup>, Zhi-Hong Xu<sup>1</sup>, Jiří Friml<sup>3</sup>, and  
5 Hong-Wei Xue<sup>4,\*</sup>

6

7 <sup>1</sup>National Key Laboratory of Plant Molecular Genetics, CAS Centre for Excellence in  
8 Molecular Plant Sciences, Chinese Academy of Sciences, 200032 Shanghai, China

9 <sup>2</sup>School of Life Sciences, Division of Life Sciences and Medicine, and Division of  
10 Molecular & Cell Biophysics, Hefei National Science Center for Physical Sciences at the  
11 Microscale, University of Science and Technology of China, Hefei 230027, China

12 <sup>3</sup>Institute of Science and Technology Austria (IST Austria), Am Campus 1, 3400  
13 Klosterneuburg, Austria

14 <sup>4</sup>Joint Centre for Single Cell Biology, School of Agriculture and Biology, Shanghai Jiao  
15 Tong University, 200240 Shanghai, China

16

17

18 **Running title:** PEL1-HBS1 mRNA translation surveillance complex

19

20 **#Contributed equally.**

21 **\*Lead contact / Corresponding author:**

22 Shanghai Jiao Tong University

23 800 Dongchuan Road, Shanghai 200240, China

24 Email: [hwxue@sjtu.edu.cn](mailto:hwxue@sjtu.edu.cn)

25

26 **Key words:** PDK1, PELOTA-HBS1 complex, phosphorylation, mRNA Surveillance,  
27 *Arabidopsis*, proteomics

28

29 **Abstract**

30

31 The quality control system for messenger RNA is fundamental for cellular activities in  
32 eukaryotes. To elucidate the molecular mechanism of 3'-Phosphoinositide-Dependent  
33 Protein Kinase1 (PDK1), an essential regulator throughout growth and development of  
34 eukaryotes, a forward genetic approach was employed to screen for suppressors of the  
35 loss-of-function T-DNA insertional *pdk1.1 pdk1.2* double mutant in *Arabidopsis*. Notably,  
36 the severe growth attenuation of *pdk1.1 pdk1.2* is rescued by *sop21* (suppressor of *pdk1.1*  
37 *pdk1.2*) that harbours a loss-of-function mutation in *PELOTA1* (*PEL1*). PEL1 is a  
38 homologue of mammalian PELOTA and yeast DOM34, which form a heterodimeric  
39 complex with the GTPase HBS1, responsible for ribosome rescue to assure the quality and  
40 fidelity of mRNA molecules. Genetic analysis further reveals that the dysfunction of  
41 PEL1-HBS complex fails to degrade the T-DNA-disrupted, truncated but functional PDK1  
42 transcripts, thus rescuing *pdk1.1 pdk1.2*. Our studies demonstrate the functionality and  
43 identify the essential functions of a homologous PELOTA-HBS1 complex in higher plant,  
44 and provide novel insights into the mRNA quality control mechanism.

45

## 46 **Introduction**

47

48 Living organisms need to monitor both the quantity and the quality of biomolecules, such as  
49 nucleic acids and proteins, to accomplish various life activities. Protein quality control is  
50 ensured by multi-level regulations both translationally and post-translationally, of which, the  
51 messenger RNA (mRNA) quality is essential for the biosynthesis of correct corresponding  
52 proteins. The quality and fidelity of mRNAs are monitored by cells autonomously, and  
53 aberrant mRNAs need to be recognised by intrinsic molecular machineries, to release stalled  
54 ribosomes and get degraded themselves (1). According to current understandings, there are  
55 at least three different mechanisms for mRNA degradation: nonsense-mediated decay  
56 (NMD), no-stop decay (NSD), and no-go decay (NGD). NMD and NSD target mRNAs with  
57 premature stop codon (terminated too soon) and lacking stop codon (failing to terminate)  
58 respectively. In mammalian cells and yeasts, the PELOTA-HBS1 (Dom34p-HBS1p)  
59 complex plays an essential role in regulating NSD (2). However, little was known about the  
60 mRNA quality control in plants so far.

61 3'-Phosphoinositide-Dependent Protein Kinase1 (PDK1) is conserved in eukaryotes and  
62 plays important roles in regulating growth and development in various organisms. As a key  
63 member of the cAMP-dependent protein kinase A / protein kinase G / protein kinase C (AGC)  
64 kinase family (3), PDK1 is important for the activation of many AGC kinases and other  
65 substrates / regulators. Studies have revealed that PDK1 plays crucial roles in the signalling  
66 pathways activated by growth factors and hormones, sustains and regulates the balance  
67 between cell growth, division and apoptosis in mammals (3-5), thus being critical for normal  
68 development. However, loss-of-function mutant *pdk1* in various species such as yeasts (6, 7),  
69 *Drosophila* (8) and mice (9), is lethal, which makes it challenging to study the downstream  
70 regulations, and functional mechanism of PDK1 is still not completely understood yet.

71 Differently from those of mammals, loss-of-function or knock-down *pdk1* mutant plants  
72 are viable, despite exhibiting severe developmental defects, including rice (10), *Arabidopsis*  
73 (11-13) and moss (14). Therefore, it provides a plausible approach to further identify genetic  
74 interactors of PDK1. There are two PDK1 paralogues in *Arabidopsis*, PDK1.1 and PDK1.2,  
75 which have redundant functions (12, 15). PDK1 binds to phospholipids, which regulate its  
76 activity as well as its subcellular localization (12, 16, 17). As a master regulator of the AGC  
77 family, PDK1 was proposed to participate in various growth and developmental processes  
78 though phosphorylating distinct kinase substrates (12, 18). For example, PDK1.1 regulates  
79 root hair development through phosphorylating OXIDATIVE SIGNAL INDUCIBLE1

80 (OXI1)/AGC2-1 kinase (19, 20). PINOID (PID), an essential regulator of PIN FORMED  
81 (PIN) auxin efflux carriers, was phosphorylated by PDK1 and thus being activated *in vitro*  
82 (21, 22). Recently, characterization of the fully knock-out *pdk1.1 pdk1.2* double mutant,  
83 uncovers the important role of plant PDK1. Both PDK1.1 and PDK1.2 are expressed in  
84 vascular tissues, and show a predominant localization at the basal side of cell plasma  
85 membrane (PM) as well as at cytoplasm in root stele. Notably, the *pdk1.1 pdk1.2* double  
86 mutant has pleotropic defects throughout growth and development, revealing an essential  
87 function of PDK1 in divergent life activities (12, 13). Importantly, the basal localization of  
88 PDK1 dominates the role of these AGC kinases with the same subcellular distribution,  
89 including D6 Protein Kinase (D6PK) / D6 Protein Kinase Likes (D6PKLs) (23) and  
90 PROTEIN KINASE ASSOCIATED WITH BRX (PAX) (24), and thus participate in the  
91 regulation of polar auxin transport (12, 13, 15).

92 To further identify regulators involved in the PDK1 pathway, a forward genetic  
93 approach was employed. Using an EMS population of *Arabidopsis pdk1.1 pdk1.2* double  
94 mutant that displays severe growth defects, a suppressor screening was performed. In this  
95 study, characterization of the identified mutant, *sop21* (suppressor of *pdk1.1 pdk1.2*), reveals  
96 that deficiency of translational mRNA surveillance PELOTA-HBS1 complex rescues the  
97 defective phenotype of *pdk1.1 pdk1.2*. Our studies demonstrate the functionality of a  
98 homologous PELOTA-HBS1 complex in higher plants and provide informative clues on the  
99 control of mRNA surveillance and thus protein homeostasis.

100

## 101 **Results**

102

### 103 **Deficiency of *PEL1* suppresses the defective growth of *Arabidopsis pdk1.1 pdk1.2***

104 PDK1 is well known as a master regulator of AGC family in eukaryotic kingdom. Two  
105 *PDK1* paralogous genes in *Arabidopsis thaliana*, *PDK1.1* (AT5G04510) and *PDK1.2*  
106 (AT3G10540) (11, 12, 14), exhibit overlapping and widespread expression pattern in various  
107 tissues (Supplementary Fig. 1). The *pdk1* single loss-of-function mutants, *pdk1.1-2* and  
108 *pdk1.2-4* (hereafter as *pdk1.1* and *pdk1.2* respectively), displayed no obvious growth  
109 phenotype (12), whereas, the double mutant *pdk1.1 pdk1.2* exhibits a range of developmental  
110 defects (Fig. 1, and Supplementary Fig. 2), including suppressed growth (smaller leaves and  
111 shorter siliques), reduced axillary shoots, suppressed primary root elongation and lateral root  
112 initiation, particularly significantly decreased fertility, and abnormal floral development (12).  
113 This is consistent with the crucial roles of PDK1 in other organisms and confirms the

114 essential role of *PDK1* in regulating plant growth and development. Several aspects of those  
115 developmental defects can be explained by known AGC kinases, such as D6PK (12), PAX  
116 (13), and AGC1.5/7 (13, 25). However, whether there are additional components in the  
117 PDK1 pathway, other than AGC kinases, remains unclear.

118 To elucidate the underlying mechanism of PDK1 function, a forward genetic screen was  
119 performed. Seeds of *pdk1.1 pdk1.2* were used to generate a mutant population by Ethyl  
120 methanesulfonate (EMS) mutagenesis and suppressors of *pdk1.1 pdk1.2* (*sop*, *suppressor of*  
121 *pdk1.1 pdk1.2*) were screened based on the rescued growth (26). More than 10 suppressors  
122 were obtained from a M<sub>2</sub> population of approximately 80,000 plants, and a recessive mutant,  
123 *sop21*, that showed an obviously rescued growth of *pdk1.1 pdk1.2* (Fig. 1 and  
124 Supplementary Fig. 2), was characterized first. Compared to a significantly suppressed  
125 growth of *pdk1.1 pdk1.2* adult plants, the rosette size of *pdk1.1 pdk1.2 sop21* is comparable  
126 to that of wild type (WT, Fig. 1A and Supplementary Fig. 2D). Similar degree of rescue was  
127 also observed for the fertility, silique length, inflorescence morphology and floral  
128 development (Fig. 1B, C, and Supplementary Fig. 2E, F). Notably, the lateral root numbers  
129 was only partially rescued to approximately 50% of WT, though with a complete rescue of  
130 primary root growth (Fig. 1D, E, F).

131 To identify the causative mutation in *sop21*, 102 progenies (referred as BC<sub>1</sub>F<sub>2</sub>) showing  
132 rescue phenotypes were selected from a segregating pool of F<sub>2</sub> individuals [102 rescued  
133 phenotype: 296 *pdk1.1 pdk1.2* phenotype, for 1:3 ratio ( $\chi^2=0.084$ , P>0.75; Chi-square test),  
134 which indicated a single recessive causal mutation] and used for DNA extraction and  
135 subsequent deep sequencing (27). Systemic analysis revealed that *sop21* carried a mutation  
136 in *PEL1* (AT4G27650) (28), which led to an early stop at amino acid residue 27 (tryptophan  
137 to terminator, W27\*), resulting in the translationally premature termination (Supplementary  
138 Fig. 2A). *PEL1* gene is widespread expressed (Supplementary Fig. 3) and cross of a null  
139 T-DNA insertional allele *pell* (SALK\_124403, also named *lesion mimic leaf1-1*, *lml1-1* (29),  
140 Supplementary Fig. 2B, C) with *pdk1.1 pdk1.2* also suppressed the growth defects of *pdk1.1*  
141 *pdk1.2* at various aspects (Fig. 1), verifying that suppression of *pdk1.1 pdk1.2* phenotype in  
142 *sop21* was a result of *PEL1* deficiency. Though *pell* mutant was previously shown to exhibit  
143 a delayed growth rate (29), both *sop21* and *pell* mutants grew normally in our hands,  
144 perhaps due to different growth conditions. In addition, expression of *PEL1-FLAG* driven by  
145 a *CaMV35S* promoter in *sop21* restored the *pdk1.1 pdk1.2* phenotype (Supplementary Fig.  
146 4A, B), confirming that *PEL1* deficiency suppressed the growth defects of *pdk1.1 pdk1.2*.  
147 Overexpression of *PEL1-FLAG* driven by *CaMV35S* in WT background did not exhibit any

148 obvious phenotype (Supplementary Fig. 4C, D).

149 Next, we constructed *35S::PEL1-GFP* and *35S::mCherry-PEL1* transgenic plants to  
150 study the subcellular localization of PEL1. Presence of PEL1-GFP and mCherry-PEL1 in  
151 cytoplasm and nucleus was observed (Fig. 2A). The subcellular localization of PEL1 is  
152 partially overlapping with that of PDK1.1, which also showed residence at cytoplasm, except  
153 for its PM localization (Fig. 2A). Further analysis using tobacco leaves revealed that both  
154 mCherry-PEL1 (Fig. 2B) and mCherry-PDK1.1 (Fig. 2C) did not distribute equally in  
155 cytoplasm, and indeed they exhibited a similar feature that both proteins localized to certain  
156 compartments associated with endoplasmic reticulum (ER).

157

### 158 **Presence of the mRNA surveillance complex PELOTA-HBS1 in *Arabidopsis***

159 Translation of aberrant mRNAs leads to stalling of translational machinery, and arrested  
160 ribosomes are specifically recognized by the PELOTA-HBS1 complex to initiate their  
161 recycling (1, 2, 30, 31). Mammalian and yeast PELOTA/DOM34 interacts with the HBS1  
162 GTPase, a translation elongation factor EF1A/initiation factor IF2 $\gamma$  family protein, to form a  
163 heterodimer and bind to stalled ribosomes, ultimately leading to ribosome rescue. Besides,  
164 HBS1 (also called SKI7) is also involved in post-transcriptional gene silencing (28, 32).  
165 Homologous analysis in *Arabidopsis* genome by using yeast and human HBS1 identified  
166 two candidate HBS1 homologues, AT5G10630 and AT1G18070 (Table S1. Sequence  
167 alignment analysis showed that only AT5G10630 had the conserved HBS1\_C domain,  
168 indicating that AT5G10630 (designated as AtHBS1, HBS1) is the HBS1 homologue in  
169 *Arabidopsis* (Supplementary Fig. 5). Considering that HBS1 functions in the same pathway  
170 as PELOTA(28), which is then chosen for further investigations. Indeed, analysis through  
171 yeast two-hybrid (Fig. 3A), bimolecular fluorescence complementation (BiFC, Fig. 3B) and  
172 GST pull-down assays (Fig. 3C) revealed the PEL1-HBS1 interactions both *in vivo* and *in*  
173 *vitro*, confirming the presence of a homologous PELOTA-HBS1 complex in higher plants.  
174 In addition, a recent study characterizing the roles of PELOTA and HBS1 in nonstop mRNA  
175 decay (28) further supports the presence of a functional PELOTA-HBS1 complex in  
176 *Arabidopsis*.

177 Similarly as *PEL1* and *PDK1s*, *HBS1* gene was ubiquitously expressed (Supplementary  
178 Fig. 6A) and a knock-down mutant of *HBS1*, *hbs1*, (Supplementary Fig. 6B-D) also  
179 suppressed the *pdk1.1 pdk1.2* phenotypes (Fig. 1A, B), indicating that deficiency of the  
180 translational mRNA surveillance complex PELOTA-HBS1 led to the suppression of *pdk1.1*  
181 *pdk1.2* phenotypes. These observations suggest that the PELOTA-HBS1 complex might

182 function via a common mechanism.

183

### 184 **PELOTA-HBS complex regulates the proper expression of truncated PDK1 transcripts**

185 The *pdk1.1-2* and *pdk1.2-4* alleles we used contained T-DNA insertions close to their  
186 3'-ends. It has been shown by Xiao and Offringa that such alleles are likely to lead to the  
187 production of a functional truncated protein. Therefore, in the same publication this was  
188 proposed to explain the lack of strong phenotypes for double mutant combinations *pdk1.1-2*  
189 *pdk1.2-2* and *pdk1.1-2 pdk1.2-3* in previous studies (11, 33). It is unlikely that this is the case,  
190 as both recent studies by Tan et al. (12) and Xiao and Offringa (13) reported highly similar  
191 phenotypes for different allele combinations. Further comparisons confirmed that the *pdk1.1*  
192 *pdk1.2* combination used in this study (*pdk1.1-2 pdk1.2-4*) as well as double mutants  
193 generated with *pdk1.1-2* and other *pdk1.2* T-DNA alleles recapitulated the phenotype of  
194 double mutant combinations with the CRISPR alleles *pdk1.1-13* or *pdk1.1-14* reported by  
195 Tan et al. (12) and Xiao and Offringa (13) (Supplementary Fig. 7A,B). We speculate that  
196 previous failures to observe strong growth and development defects in *pdk1.1-2 pdk1.2-2* or  
197 *pdk1.1-2 pdk1.2-3* double mutant lines (11, 33) are most likely due to a failure to achieve  
198 true double homozygous plants. Interestingly, we also noted that our *pdk1.1 pdk1.2* plants  
199 are larger than the other five double mutant combinations, confirming that still a low level of  
200 functional PDK1 is produced in these plants.

201 Interestingly, it was also noted that *pdk1.1 pdk1.2* plants are larger than other double  
202 mutant combinations, suggesting the remaining function of PDKs. RT-qPCR analysis  
203 revealed that there was no detectable expression for both *PDK1.1* and *PDK1.2* in *pdk1.1*  
204 *pdk1.2* backgrounds, with the primers across T-DNA insertions (Fig. 2D, E), ruling out the  
205 possibility of existing full-length *PDK1.1* or *PDK1.2* transcripts. Nonetheless, increased  
206 truncated transcript levels of *PDK1.1* and *PDK1.2* were detected in *pdk1.1 pdk1.2 sop21*,  
207 *pdk1.1 pdk1.2 pel1* or *pdk1.1 pdk1.2 hbs1* (to approximately 50% and 90% of Col-0  
208 respectively), compared to that in *pdk1.1 pdk1.2* (10% and 25% of Col-0 for *PDK1.1* and  
209 *PDK1.2* respectively), with primers amplifying the fragments before T-DNA insertions (Fig.  
210 2F, G). This was further confirmed by semi-quantitative PCR (Supplementary Fig. 8A). The  
211 PELOTA-HBS1 complex is responsible for the release of arrested ribosomes during the  
212 translation of aberrant mRNAs, so called “mRNA surveillance” (28). Given that T-DNA  
213 insertions at 3'-end might lead to aberrant *PDK1.1* and *PDK1.2* transcripts fused with certain  
214 T-DNA fragments but without a proper stop codon, it is not surprising to detect only 10%  
215 and 25% of *PDK1.1* and *PDK1.2* 5'-fragments in *pdk1.1 pdk1.2*. Consistently, there was an

216 increase of their expression in *pdk1.1 pdk1.2 sop21*, *pdk1.1 pdk1.2 pel1* or *pdk1.1 pdk1.2*  
217 *hbs1* plants. The above observations led us to test whether the increased levels of truncated  
218 PDK1.1 or PDK1.2 could explain for the rescue of *pdk1.1 pdk1.2*.

219 By transforming a mCherry-fused PDK1.1N (1-480 aa) (12) driven by *pPDK1.1*  
220 promoter into *pdk1.1 pdk1.2*, a partial rescue was observed (Fig. 2H). In addition,  
221 overexpression of *Venus-PDK1.1N* or *Venus-PDK1.2N* driven by a *CaMV35S* promoter  
222 completely rescued the phenotype of *pdk1.1 pdk1.2* (Supplementary Fig. 8B). Therefore, we  
223 conclude that the *pel1* and *hbs1* mutations might rescue the phenotype of *pdk1.1 pdk1.2* via  
224 disrupting the function of PELOTA-HBS1 mRNA surveillance complex and thus  
225 upregulating the N-terminal truncated proteins of PDK1.1 and PDK1.2, which preserves a  
226 functional kinase activity (13).

227

## 228 **PDK1 regulates development and stress responses through coordinating multiple** 229 **metabolic pathways**

230 The PELOTA-HBS1 complex regulates the mRNA quality control by rescuing stalled  
231 ribosomes during protein biosynthesis (28). PDK1 is also an essential regulator of protein  
232 translation, via modulating the activity of ribosome RPS6 proteins through S6K AGC kinase  
233 (34). We therefore performed a proteomic analysis to study their functions at the whole  
234 proteome level. First, being consistent, subcellular localization analysis by transiently  
235 expressing YFP- or GFP-fused proteins in *Arabidopsis* leaf protoplasts and tobacco leaves  
236 clearly showed that PDK1, PEL1 and HBS1 proteins located at plasma membrane (PM),  
237 cytoplasm and certain ER associated compartments at cytoplasm (Fig. 2B; Supplementary  
238 Fig. 9). In addition, PEL1-YFP exhibits nuclear distribution as well, which was undetectable  
239 for PDK1s and HBS1 (Fig. 2A; Supplementary Fig. 9A, B). We speculate that these proteins  
240 might present differential functions beyond the potential common pathways.

241 A tandem mass tag (TMT)-based comparative proteomics analysis was then performed  
242 using shoots and roots of two-week-old seedlings, and 6995 and 8137 proteins were  
243 quantified in shoots and roots respectively. We studied shoots and roots separately, because  
244 they might have totally different proteomes. Of the identified proteins, 54 and 49 proteins in  
245 shoots or roots respectively (one protein in both shoots and roots, Fig. 5A) were significantly  
246 changed in *pdk1.1 pdk1.2*, while rescued (no significant difference from WT) in *pdk1.1*  
247 *pdk1.2 pel1*. These changed proteins were designated as RCE (restored commonly expressed)  
248 proteins and were speculated being responsible for the defective growth of *pdk1.1 pdk1.2*.  
249 Most RCE proteins showed increased levels (84 of 102 proteins) in *pdk1.1 pdk1.2*,



250 suggesting that PDK1 deficiency led to the enhanced recycling of ribosomes and hence the  
251 increased abundance of RCE proteins, further confirming that PDK1-mediated regulation of  
252 PELOTA-HBS1 complex is crucial to maintain the normal recycling of ribosomes and  
253 protein synthesis.

254 KEGG analysis of RCE proteins revealed the enriched metabolic pathways including  
255 lipids, carbohydrates, phenylpropanoid and amino acids, and involvement in multiple  
256 developmental processes and environmental adaptation (Table 1), which was consistent with  
257 the general growth defects of *pdk1.1 pdk1.2*. A nitrogen-regulated glutamine  
258 amidotransferase GAT 1\_2.1 that represses shoot branching (35) increased in *pdk1.1 pdk1.2*,  
259 which is consistent with the solitary stem phenotype of *pdk1.1 pdk1.2*. Furthermore,  
260 increased DUF 642 family proteins DGR1 and DGR2 (36) and several root-hair-related  
261 proteins including SRPP (37), PRPL1 (38), GH9C1 (39), DER9 (40) and AGC2-1 (41) (a  
262 known PDK1 substrate) may account for the altered root development.

263 A large number of pathogen-induced defense-related or systemic acquired resistance  
264 (SAR)-related proteins (42-50) accumulated in *pdk1.1 pdk1.2* (Table 1). Meanwhile, some  
265 abiotic stress-related proteins, especially cold acclimation/responsive proteins (51-54)  
266 significantly increased in *pdk1.1 pdk1.2* shoots. This is consistent with the previous studies  
267 showing that PDK1 positively regulates basal resistance in rice (10) and PDK1 is required  
268 for *P. indica*-induced growth promotion (11), and the rice PELOTA protein is involved in  
269 bacterial leaf blight resistance (55).

270 Notably, the TMT-based comparative proteomics analysis also showed that PEL1 and  
271 HBS1 presented unchanged protein abundance in *pdk1.1 pdk1.2* (Supplementary Fig. 10A,  
272 B). Next, we examined these known PDK1 substrates from the AGC family. Notably, there is  
273 an increase of D6PK protein, an essential downstream component of PDK1 (12), in *pdk1.1*  
274 *pdk1.2*, but a relatively lower level of D6PK in *pdk1.1 pdk1.2 pel1* (Supplementary Fig.  
275 11A). No dramatic changes were found for other detected AGC proteins in the proteomics  
276 data (Supplementary Fig. 11A, B). Therefore, it is very unlikely that changes of these AGC  
277 substrates might account for the rescue of *pdk1.1 pdk1.2* by the *pel1* mutation.

## 278 Discussion

279

280 PDK1 is highly conserved in eukaryotes and is essential for growth and development of  
281 various organisms. *PDK1* deficiency results in severe growth defects or even lethality, which  
282 have impeded the studies on the underlying molecular mechanism, especially in mammals.  
283 Taking advantage of plant genetics and by screening for the suppressors that rescue the  
284 growth defects of T-DNA insertional *pdk1.1 pdk1.2* mutants, we here identify PEL1, which  
285 is a component of the PEL1-HBS1 mRNA surveillance complex and is essential for the  
286 mRNA quality control during protein translation. The mechanism for the *pell* and *hbs1*  
287 mutations suppressing the *pdk1.1 pdk1.2* phenotype is their inability to degrade the aberrant  
288 mRNAs, leading to the production of truncated but functional PDK1 proteins (Fig. 5A, B).  
289 Our studies reveal that the PEL1-HBS1 complex coordinates the ribosome rescue and  
290 protein biosynthesis (Fig. 6A)

291 PEL1-HBS1 complex plays important roles in the mRNA quality control. Our study is  
292 a typical example how this mRNA surveillance system regulates the stability of aberrant  
293 transcripts. Intriguingly, loss of function of DOM34 or PELOTA causes mitotic arrest in  
294 yeast and *Drosophila* and the *pelota* mutant mouse is lethal (57), whereas the *Arabidopsis*  
295 mutants *sop21*, *pell*, and *hbs1* are viable, suggesting the different regulatory modes for  
296 protein translational regulation. Though the *pdk1.1 pdk1.2* double mutant exhibits pleiotropic  
297 defects throughout growth and development, the mutant can complete a life cycle (12). It is  
298 speculated that the difference might be related to the high postembryonic developmental  
299 plasticity in plants compared with animals, owing to the sessile life style during evolution.

300 Proteomics analysis indicates that the PEL1-HBS1 complex and PDK1 play pivotal  
301 roles in modulating the activity of the protein synthesis machinery under normal conditions.  
302 Notably, >80% RCE proteins are with increased abundances, and few decreased RCE  
303 proteins may due to the indirect/feedback regulation. The changed levels of most RCE  
304 proteins in *pdk1.1 pdk1.2* is reversed by the *pell* mutation, suggesting a rescue at the whole  
305 proteome level. Given the lipid binding property of PDK1 and the localizations of PDK1 at  
306 PM, cytoplasm and certain ER-associated compartments, the pathway proposed here might  
307 be responsive to lipid dynamics at the membrane. Further characterization of the exact role  
308 of lipids in this process will help to elucidate the molecular mechanistic framework  
309 underlying the control of cell growth. In animals, PDK1 can phosphorylate one AGC kinase,  
310 AKT (aka Protein Kinase B, PKB) and S6K, to regulate protein biosynthesis through  
311 modulating 40S ribosomal protein 6S-A (RPS6A) and B (RPS6B), two subunits of

312 ribosomes (8, 34). There are also two S6K homologues in *Arabidopsis*, previously reported  
313 to regulate protein synthesis via RPS6A/B (58). However, whether these two S6Ks are  
314 regulated by PDK1 requires further investigation.

315 *pdk1.1 pdk1.2* exhibits pleiotropic growth and developmental defects, including  
316 significantly reduced fertility, which may be due to the changed levels of embryonic  
317 development-related proteins EMB 1923, RESURRECTION1 (RST1) (32, 59–61) and  
318 YELLOW STRIPE-LIKE3 (YSL3) (62). Notably, RST1 is a crucial regulator for RNA  
319 metabolism and thus the post-transcriptional gene silencing pathway (32, 60). Together with  
320 the previous biochemical evidence showing that RST1 forms a complex with HBS1 (SKI7)  
321 involved in post-transcriptional gene silencing (32), we speculated that the change of RST1  
322 protein levels might be due to the altered status of HBS1 protein in *pdk1.1 pdk1.2*. We  
323 speculate that the increase level of RST1 might function as a compensation mechanism for  
324 the overall accelerated protein synthesis in *pdk1.1 pdk1.2*. Moreover, RST1 was recently  
325 identified as a regulator of the vacuolar protein degradation pathway (61), implying a role of  
326 PDK1 in the endomembrane trafficking process. Interestingly, precursors of two major  
327 storage proteins, 2S albumin and 12S globulin (63, 64) (Table 1) are significantly  
328 accumulated in *pdk1.1 pdk1.2* shoots. Likewise, a number of nutrient reserve-related proteins  
329 including lipid transfer protein LTP3 (54), lipoxygenase protein LOX2 (65), oleosin OLE2  
330 (66) and seed-specific protein AT2G05580 (67) exhibited the same change in *pdk1.1 pdk1.2*.  
331 Storage proteins are actively synthesised at rough ER as precursor forms and then are  
332 transported into protein storage vacuole (PSV) during seed maturation (68). In higher plants,  
333 seed storage proteins are deposited in PSVs of dry seeds as a source of nitrogen for growth  
334 after seed germination (68, 69). Accumulation of seed storage proteins and nutrient  
335 reserve-related proteins in *pdk1.1 pdk1.2* shoots may result in the altered vegetative growth.  
336 This indicates that PDK1 represses seed storage proteins and nutrient reserve-related  
337 proteins in the vegetative tissues or the nitrogen utilization after seed germination.

338 It is noteworthy that the *pdk1.1 pdk1.2* phenotype is not fully rescued by *pell* mutations,  
339 or by a truncated *PDK1.IN* transgene. We speculate that the truncated PDK1 protein only  
340 keeps partial functionality. Meanwhile, PDK1 may also regulate specific life activities  
341 through phosphorylating distinct substrates, including those well-characterised AGC kinases  
342 as well as possible others (12, 18). How these downstream pathways coordinate with each  
343 other, special-temporally, needs further investigation.

## 344 **Materials and Methods**

345

### 346 **Materials and growth conditions**

347 *Arabidopsis thaliana* lines used in this study were all in ecotype Columbia (Col-0)  
348 background. Seeds of Col-0 and various mutants, transgenic lines were germinated on MS  
349 (Murashige and Skoog, Duchefa) medium after two days' stratification at 4°C. Seedlings and  
350 plants were grown in a phytotron at 22°C with a 16-h light / 8-h dark photoperiod. Root  
351 growth measurements were performed using 14-day-old seedlings grown on MS.

352 Mutant lines *pdkl.1-2* (*pdkl.1*, SALK\_113251C) (12), *pdkl.2-4* (*pdkl.2*,  
353 SALK\_017433) (12), *pell* (*pell*, SALK\_124403C), and *hbs1* (*hbs1*, CS857798) were  
354 obtained from ABRC (70) (Arabidopsis Biological Resource Centre) and were genotyped by  
355 using corresponding LB, RP and LP primers (Supplementary Table 2). *pPDK1.1::GUS* and  
356 *pPDK1.2::GUS* were reported previously (12). The floral dip method (71) was used for plant  
357 transformation.

358

### 359 **Reverse transcription-quantitative real-time RT-PCR (RT-qPCR) analysis**

360 Total RNA was extracted from seedlings using TRIzolR reagent (Invitrogen), incubated  
361 with DNAase (TAKARA) and reverse transcribed (TAKARA). Transcription of  
362 corresponding genes and *ACTIN7* was analysed using SYBR Premix Ex Taq (TAKARA)  
363 with a BIO-RAD CFX Connect Real-Time System. Relative expression of examined genes  
364 was calculated by setting the gene expression level of wild type as “1” and was presented as  
365 average ± standard deviation (SD) from three independent biological replicates.

366

### 367 **Promoter::β-glucuronidase (GUS) staining for expression pattern analysis**

368 *pPDK1.1::GUS* and *pPDK1.2::GUS* transgenic lines were reported previously (12), and  
369 *pPELL1::GUS* and *pHBS1::GUS* lines were cloned with a modified pCambia1300 binary  
370 vector (72) using primers listed in Supplementary Table 2. Stable transgenic lines were  
371 stained at 37°C for 1 h, in GUS solution [0.5 mg/mL  
372 5-bromo-4-chloro-3-indolyl-β-d-glucuronic acid (X-Gluc), 0.5 mM potassium ferricyanide  
373 (K<sub>4</sub>[Fe(CN)<sub>6</sub>]·3H<sub>2</sub>O), 0.5 mM potassium ferrocyanide (K<sub>3</sub>[Fe(CN)<sub>6</sub>]), 0.1% (v/v) Triton  
374 X-100, 10 mM ethylenediaminetetraacetic acid (EDTA) and 0.1 M sodium phosphate  
375 (NaH<sub>2</sub>PO<sub>4</sub>); pH 7.0] (12). Three independent lines were analysed in detail for different  
376 tissues and stages, and they all showed similar expression patterns. Samples were imaged by  
377 a stereomicroscope (Nikon SMZ1500).

378

### 379 **Yeast two-hybrid (Y2H) assay**

380 Y2H assays were performed as reported previously (73). Coding sequences of *PEL1*,  
381 *PEL1*<sup>T43A</sup> and *PEL1*<sup>T43E</sup> were amplified by PCR with PEL1-F (*Bam*HI)-3 and PEL1-R  
382 (*Bam*HI) primers, and were then subcloned into the pGBKT7 vector (Clontech). Coding  
383 sequences of HBS1 [using primers HBS1-F (*Eco*RI) and HBS1-R (*Bam*HI)] and HBS1  
384 [using primers HBS1-2-F (*Nde*I) and HBS1-2-R (*Bam*HI)] were amplified and subcloned  
385 into pGADT7 vectors (Clontech). Bait and prey plasmids were co-transformed into the yeast  
386 strain AH109 according to the manufacture's introduction (Clontech). Transformants were  
387 selected on SD (-Leu/-Trp) solid medium. For auxotroph assays, four individual colonies  
388 were cultured in liquid SD (-Leu/-Trp) medium overnight, and approximately 10 µL of each  
389 sample at different dilutions (as indicated in the figure legends) was dropped on SD  
390 (-Leu/-Trp/-His) medium supplemented with 0.5 mg/mL X-α-Gal or on SD  
391 (-Leu/-Trp/-His/-Ade) medium, respectively, with 1 mM 3-amino-1,2,4-triazole (3-AT), and  
392 grown at 30°C for 3 days. Colonies showing continuous growth with a blue colour  
393 represented interactions.

394

### 395 **Bimolecular fluorescence complementation (BiFC) assay**

396 For BiFC assay, cDNAs encoding *PDK1.1*, *PDK1.2*, *PEL1* and *HBS1* were cloned into  
397 the pENTR plasmid with BP reactions. Afterwards, LR reactions were conducted with the  
398 35S::GW-nYFP and 35S::GW-nYFP destination vectors (74), resulting in  
399 35S::*PDK1.1-nYFP*, 35S::*PDK1.1-cYFP*, 35S::*PDK1.2-nYFP*, 35S::*PDK1.2-cYFP*,  
400 35S::*PEL1-nYFP* and 35S::*HBS1-cYFP*, respectively. Resultant constructs with control  
401 blank vectors were co-expressed in *N. benthamiana* leaves and yellow fluorescence was  
402 observed by a Leica SP8 confocal laser scanning microscope, using an argon laser excitation  
403 wavelength of 488 nm after infiltration for 48 days.

404

### 405 **Subcellular localization and co-localization studies**

406 For subcellular localization studies, cDNAs encoding *PDK1.1*, *PDK1.2*, *PEL1* and  
407 *HBS1* were first cloned into the pENTR plasmid with BP reactions. Afterwards, LR  
408 reactions were conducted with the pGWB605 destination vector, resulting in  
409 *pGWB605-35S::*PDK1.1-GFP**, *pGWB605-35S::*PDK1.2-GFP**, *pGWB605-35S::*PEL1-GFP**  
410 and *pGWB605-35S::*HBS1-GFP**, respectively. PDK1.1-GFP, PDK1.2-GFP, PEL1-GFP,  
411 HBS1-GFP and ER-mCherry (75) fusion proteins were transiently expressed in *N.*

412 *benthamiana* leaves (76). For mCherry fusion studies, *PDK1.1* and *PEL1* were cloned into  
413 the pB7m24GW2 destination vector. *35S::GFP-HDEL* was used for the ER reporter. The  
414 infiltrated leaves were harvested 2 days after infiltration and observed using an Olympus  
415 confocal microscope (Olympus, FV10i). *PDK1.1-YFP*, *PDK1.2-YFP*, *PEL1-YFP*, and  
416 *HBS1-YFP* were cloned into the pA7 plasmid and transiently expressed in leaf protoplasts of  
417 wild type, *Arabidopsis* seedlings expressing ER-mCherry (75), or PIP2-RFP (77).  
418 Transformed protoplasts were harvested 12 hours after transformation and observed using an  
419 Olympus confocal microscope (Olympus, FV10i).

420 For *35S::PDK1.1-GFP*, *35S::PDK1.2-GFP* and *35S::PEL1-GFP* transgenic plants,  
421 entry vectors were reacted with pB7FWG2,0 plasmids for GFP fusion expression.  
422 Transformation was performed with the floral dip method (71) with the *Agrobacteria* strain  
423 GV3101.

424 Images were captured with following excitation (Ex) and emission (Em) wavelengths  
425 (Ex/Em): GFP 488 nm/501-528 nm; /YFP 490 nm/520-550 nm; mCherry/RFP 543  
426 nm/620-630 nm; DAPI 405 nm/437-476 nm.

427

#### 428 **Protein extraction and Western blot analysis**

429 To examine the protein levels of FLAG- and GFP-tagged proteins, approximately 100  
430 mg of plant tissues were frozen in liquid nitrogen, ground thoroughly, and homogenized in  
431 100  $\mu$ L protein extraction buffer [20 mM Tris-HCl, pH 7.5, 150 mM NaCl, 0.5% (v/v)  
432 Tween-20, 1 mM EDTA, 1 mM DTT] containing a protease inhibitor cocktail (cComplete,  
433 Roche) and a protein phosphatase inhibitor tablet (PhosSTOP, Roche). After addition of SDS  
434 loading buffer, the samples were heated at 65°C for 5 min, resolved by 10% (v/v)  
435 SDS-PAGE and transferred to PVDF membranes. FLAG-tagged proteins were detected by a  
436 mouse anti-FLAG antibody (M20008, 1:2,000, Abmart). GFP-tagged proteins were detected  
437 with a mouse anti-GFP antibody (M20004, 1:2,000, Abmart) or a mouse anti-GFP  
438 HRP-conjugated antibody (130-091-833, 1:2,000, MACS Molecular). His-tagged proteins  
439 were detected by a mouse anti-His antibody (sc-8036, 1:3000, Santa Cruz Biotechnology).  
440 GST-tagged proteins were detected by a mouse anti-GST antibody (sc-138, 1:3000, Santa  
441 Cruz Biotechnology). Actin was detected by a mouse anti-actin antibody (M20009, 1:2,000,  
442 Abmart). HRP activity was detected by the Supersignal Western Detection Reagents  
443 (Thermo Scientific). After incubated with a primary mouse antibody, the PVDF membrane  
444 was then incubated with a goat anti-mouse immunoglobulin G AP-conjugated secondary  
445 antibody (ab97020, 1:5000, Abcam). AP activity was detected by BCIP/NBT kit (Invitrogen)

446 according to the supplier's instructions.

447

#### 448 **Protein expression and *in vitro* kinase assay**

449 Coding regions of PDK1.1, PEL1 and HBS1 were amplified with corresponding primers,  
450 and subcloned into vectors pET28a (Novagen) or pGEX-4T-1 (GE Healthcare) respectively.  
451 Proteins were recombinantly expressed in *Escherichia coli* (strain BL21) by supplementing  
452 with 1 mM or 0.2 mM isopropyl- $\beta$ -D-thiogalactopyranoside (IPTG, induced at either 28°C  
453 for 3 h or 16°C for 16 h). Fusion proteins with His tag were purified using Ni-NTA His  
454 binding resin (Novagen) and those with GST tag was purified by glutathione sepharose  
455 (Novagen).

456 Kinase activity assay was performed according to previous reports(12, 22, 78) with  
457 minor modifications. Assay was initiated by adding 1  $\mu$ g recombinant His-PDK1.1 in a total  
458 volume of 40  $\mu$ L containing 50 mM Tris-HCl, pH 7.5, 5 mM MgCl<sub>2</sub>, 2 mM CaCl<sub>2</sub>, 1 mM  
459 DTT (1,4-dithiothreitol), 0.1 mM ATP (Adenosine 5'-triphosphate), 5  $\mu$ Ci [ $\gamma$ -<sup>32</sup>P]ATP  
460 (NEC902A; Perkin-Elmer), and 10  $\mu$ g of substrate (recombinant His-PEL1, His-PEL1<sup>T43A</sup>,  
461 or GST-HBS1). Reactions were incubated at 30°C for 45 min and terminated by adding 2 $\times$   
462 SDS loading buffer. After boiling for 5 min, the reaction products were fractionated by  
463 SDS-PAGE (sodium dodecyl sulfate-polyacrylamide gel electrophoresis), and the  
464 radioactivity was collected by a phosphor screen. After 10 hour, the phosphor screen was  
465 imaged by autoradiography (Fujifilm FLA 9000 plus DAGE).

466

#### 467 **A tandem mass tag (TMT)-based comparative proteomics analysis**

468 A tandem mass tag (TMT)-based comparative proteomics analysis is performed  
469 according to Thompson's research (79). Wild type, *pdk1.1 pdk1.2*, *pdk1.1 pdk1.2 pel1*  
470 seedlings grow for 14 days on the 1/2MS dishes. One gram shoots (aerial parts) and 0.6 g  
471 roots (underground parts) of three genotypes of seedlings were set as group1 and group2  
472 respectively. Experiments were biological repeated for three times.

473 Samples were frozen in liquid nitrogen and ground homogeneously. 5 times volume of  
474 TCA/acetone (1:9) was added to the powder and mixed by vortexing. The mixture was  
475 placed at -20°C for 4 h, and centrifuged at 6, 000 g for 40 min at 4°C. The supernatant was  
476 discarded. The pre-cooling acetone was added to wash for three times. The pellet was air  
477 dried. 30 times volume of SDT buffer was added to 20-30 mg powder, mixed and boiled for  
478 5 min. The lysate was sonicated and then boiled for 15 min. After centrifuged at 14, 000 g  
479 for 40 min, the supernatant was filtered with 0.22  $\mu$ m filters. The filtrate was quantified with

480 the BCA Protein Assay Kit (Bio-Rad, USA). The sample was stored at  $-80^{\circ}\text{C}$ .

481 20  $\mu\text{g}$  of proteins for each sample were mixed with  $5\times$  loading buffer respectively and  
482 boiled for 5 min. Proteins were separated with 12.5% SDS-PAGE (constant current 14 mA,  
483 90 min) and bands were visualized by Coomassie Blue R-250 staining.

484 200  $\mu\text{g}$  of proteins for each sample were incorporated into 30  $\mu\text{l}$  SDT buffer (4% SDS,  
485 100 mM DTT, 150 mM Tris-HCl, pH 8.0). The detergent, DTT and other  
486 low-molecular-weight components were removed using UA buffer (8 M Urea, 150 mM  
487 Tris-HCl pH 8.0) by repeated ultrafiltration (Microcon units, 10 kDa). Then 100  $\mu\text{l}$   
488 iodoacetamide (100 mM IAA in UA buffer) was added to block reduced cysteine residues  
489 and the samples were incubated for 30 min in darkness. The filters were washed with 100  $\mu\text{l}$   
490 UA buffer three times and then 100  $\mu\text{l}$  100 mM TEAB buffer twice. Finally, the protein  
491 suspensions were digested with 4  $\mu\text{g}$  trypsin (Promega) in 40  $\mu\text{l}$  TEAB buffer overnight at  
492  $37^{\circ}\text{C}$ , and the resulting peptides were collected as a filtrate. The peptide content was  
493 estimated by UV light spectral density at 280 nm using an extinctions coefficient of 1.1 of  
494 0.1% (w/v) solution that was calculated on the basis of the frequency of tryptophan and  
495 tyrosine in vertebrate proteins.

496 100  $\mu\text{g}$  peptide mixture of each sample was labelled using TMT reagent according to the  
497 manufacturer's instructions (Thermo Fisher Scientific) and analysed on an Orbitrap Fusion  
498 Lumos (Thermo Scientific) mass spectrometer coupled with Ultimate 3000 RSLC nano  
499 system. 4  $\mu\text{l}$  of each fraction was injected for nano LC-MS/MS analysis. The peptide mixture  
500 (1  $\mu\text{g}$ ) was loaded onto the Acclaim PepMap 100 analytical column (75  $\mu\text{m} \times 15 \text{ cm}$ , C18, 3  
501  $\mu\text{m}$ , Thermo Scientific) in buffer A (0.1% Formic acid) and separated with a linear gradient  
502 of buffer B (80% acetonitrile and 0.1% Formic acid) at a flow rate of 300 nl/min. The  
503 electrospray voltage of 2.1 kV versus the inlet of the mass spectrometer was used. Mass  
504 spectrometer was operated in the data-dependent mode to switch automatically between MS  
505 and MS/MS acquisition with a cycle time of 3 second. Survey full-scan MS spectra (m/z  
506 375-1800) were acquired with a mass resolution of 120K, followed by sequential high  
507 energy collisional dissociation (HCD) MS/MS scans with a resolution of 50K. In all cases,  
508 one microscan was recorded using dynamic exclusion of 40 seconds. For MS/MS, precursor  
509 ions were activated using 38% normalized collision energy.

510 MS/MS spectra were analysed using ProteinDiscoverer<sup>TM</sup> Software 2.1 against  
511 TAIR10\_pep\_20101214 database and decoy database with following parameters. The  
512 highest score for a given peptide mass (best match to that predicted in the database) was used  
513 to identify parent proteins. Parameters for protein searching were set as follows: tryptic



514 digestion with at most two missed cleavages, carbamidomethylation of cysteines as fixed  
515 modification, and oxidation of methionines and protein N-terminal acetylation as variable  
516 modifications. Peptide spectral matches were validated based on q values at a 1% false  
517 discovery rate (FDR).

518 Proteins were considered differentially expressed when they displayed significant  
519 changes (more than 1.2-fold and Student's *t* test, *P* value < 0.05).

520 The FASTA protein sequences of differentially changed proteins were blasted against the  
521 online Kyoto Encyclopedia of Genes and Genomes (KEGG) database  
522 (<http://geneontology.org/>) to retrieve their KOs and were subsequently mapped to pathways  
523 in KEGG. The corresponding KEGG pathways were extracted.

524

### 525 **Quantification and statistics**

526 Lateral root numbers were counted directly. For measurements of silique length, primary  
527 root length and leaf area, photos were analysed with the Image J program  
528 (<https://imagej.nih.gov/ij/download.html>). Fluorescence intensity of reporter lines was  
529 analysed and quantified by Fiji (<https://fiji.sc/>) (80). Data visualisation and statistics were  
530 performed with GraphPad Prism8. Student's *t*-test was used for comparing two data sets, and  
531 one-way ANOVA was performed for multiple comparisons.

532

### 533 **Acknowledgements**

534 We gratefully acknowledge the *Arabidopsis* Biological Resource Centre (ABRC) for  
535 providing T-DNA insertional mutants, and Prof. Remko Offringa for sharing published seeds.  
536 We thank Xixi Zhang for the pDONR-P4P1r-mCherry plasmid, Alexander Johnson and  
537 Hana Semeradova for helpful comments. The study was supported by National Science  
538 Foundation of China (NSFC, 31721001, to H.-W. X.), "Ten-Thousand Talent Program" (to  
539 H.-W. X.) and Collaborative Innovation Center of Crop Stress Biology, Henan Province, and  
540 Austrian Science Fund (FWF): I 3630-B25 (to J. F.). S.T. was funded by a European  
541 Molecular Biology Organization (EMBO) long-term postdoctoral fellowship (ALTF  
542 723-2015).

543

### 544 **Author contributions**

545 W. K. performed acquisition of most of the data on *sop21* as well as analysis and  
546 interpretation of data and drafted the article. S. T. generated and analysed various mutant  
547 materials, as well as the generation of *pdk1.1 pdk1.2* EMS population and marker lines,

548 suppressor screening and subcellular localization analysis. Q. Z. performed the backcross  
549 and the NGS analysis. D.-L. L. performed RT-qPCR and semi-quantitative analysis for *pell*  
550 crosses. H.-W. X. is responsible for conception and design. Z.-H. X. and J.F. helped design  
551 experiments. W.K., S.T., J.F. and H.-W. X. wrote the manuscript, and all authors revised and  
552 approved it.

553

#### 554 **Conflict of Interests**

555 The authors declare no competing financial interests.

556

#### 557 **Data and materials availability**

558 All data and materials necessary to evaluate the conclusions in paper or supplementary  
559 materials are available.

560

#### 561 **Supplementary Information**

562 Supplementary Figures. 1 to 11

563 Supplementary Tables. 1 to 2

564 **References**

565

- 566 1. T. Tsuboi, K. Kuroha, K. Kudo, S. Makino, E. Inoue, I. Kashima, T. Inada, Dom34:hbs1  
567 plays a general role in quality-control systems by dissociation of a stalled ribosome at  
568 the 3' end of aberrant mRNA. *Mol. Cell.* **46**, 518–529 (2012).
- 569 2. C. J. Shoemaker, D. E. Eyler, R. Green, Dom34:Hbs1 promotes subunit dissociation and  
570 peptidyl-tRNA drop-off to initiate no-go decay. *Science.* **330**, 369–372 (2010).
- 571 3. D. R. Alessi, Discovery of PDK1, one of the missing links in insulin signal transduction.  
572 *Biochem. Soc. Trans.* **29**, 1–14 (2001).
- 573 4. A. Mora, D. Komander, D. M. F. Van Aalten, D. R. Alessi, PDK1, the master regulator  
574 of AGC kinase signal transduction. *Semin. Cell Dev. Biol.* **15**, 161–170 (2004).
- 575 5. A. Storz, P., Toker, 3-phosphoinositide-dependent kinase-1 PDK-1 in PI 3-kinase  
576 signaling. *Front. Biosci.* **7**, 886–902 (2002).
- 577 6. A. Casamayor, P. D. Torrance, T. Kobayashi, J. Thorner, D. R. Alessi, Functional  
578 counterparts of mammalian protein kinases PDK1 and SGK in budding yeast. *Curr. Biol.*  
579 **9** (1999), pp. 186–197.
- 580 7. M. Inagaki, T. Schmelzle, K. Yamaguchi, K. Irie, M. N. Hall, K. Matsumoto, PDK1  
581 homologs activate the Pkc1-mitogen-activated protein kinase pathway in yeast. *Mol.*  
582 *Cell. Biol.* **19**, 8344–52 (1999).
- 583 8. F. Rintelen, H. Stocker, G. Thomas, E. Hafen, PDK1 regulates growth through Akt and  
584 S6K in *Drosophila*. *Proc. Natl. Acad. Sci.* **98**, 15020–15025 (2001).
- 585 9. M. A. Lawlor, A. Mora, P. R. Ashby, M. R. Williams, V. Murray-Tait, L. Malone, A. R.  
586 Prescott, J. M. Lucocq, D. R. Alessi, Essential role of PDK1 in regulating cell size and  
587 development in mice. *EMBO J.* **21**, 3728–3738 (2002).
- 588 10. H. Matsui, A. Miyao, A. Takahashi, H. Hirochika, Pdk1 kinase regulates basal disease  
589 resistance through the OsOx11-OsPtila phosphorylation cascade in rice. *Plant Cell*  
590 *Physiol.* **51**, 2082–2091 (2010).
- 591 11. I. Camehl, C. Drzewiecki, J. Vadassery, B. Shahollari, I. Sherameti, C. Forzani, T.  
592 Munnik, H. Hirt, R. Oelmüller, The OX11 kinase pathway mediates *Piriformospora*  
593 *indica*-induced growth promotion in *Arabidopsis*. *PLoS Pathog.* **7**, e1002051 (2011).
- 594 12. S. Tan, X. Zhang, W. Kong, X.-L. Yang, G. Molnár, Z. Vondráková, R. Filepová, J.  
595 Petrášek, J. Friml, H.-W. Xue, The lipid code-dependent phosphoswitch PDK1–D6PK  
596 activates PIN-mediated auxin efflux in *Arabidopsis*. *Nat. Plants.* **6**, 556–569 (2020).
- 597 13. Y. Xiao, R. Offringa, PDK1 regulates auxin transport and *Arabidopsis* vascular

- 598 development through AGC1 kinase PAX. *Nat. Plants*. **6**, 544–555 (2020).
- 599 14. A. C. N. Dittrich, T. P. Devarenne, Characterization of a PDK1 Homologue from the  
600 Moss *Physcomitrella patens*. *Plant Physiol.* **158** (2012), pp. 1018–1033.
- 601 15. S. Tan, C. Luschnig, J. Friml, Pho-view of Auxin: Reversible Protein Phosphorylation in  
602 Auxin Biosynthesis, Transport and Signalling. *Mol. Plant*. **14**, 151–165 (2021).
- 603 16. R. G. Anthony, R. Henriques, A. Helfer, T. Mészáros, G. Rios, C. Testerink, T. Munnik,  
604 M. Deák, C. Koncz, L. Bögre, A protein kinase target of a PDK1 signalling pathway is  
605 involved in root hair growth in *Arabidopsis*. *EMBO J.* **23**, 572–581 (2004).
- 606 17. M. Deak, A. Casamayor, R. A. Currie, C. Peter Downes, D. R. Alessi, Characterisation  
607 of a plant 3-phosphoinositide-dependent protein kinase-1 homologue which contains a  
608 pleckstrin homology domain. *FEBS Lett.* **451**, 220–226 (1999).
- 609 18. H. Zegzouti, W. Li, T. C. Lorenz, M. Xie, C. T. Payne, K. Smith, S. Glenney, G. S. Payne,  
610 S. K. Christensen, Structural and functional insights into the regulation of *Arabidopsis*  
611 AGC VIIIa kinases. *J. Biol. Chem.* **281**, 35520–35530 (2006).
- 612 19. M. C. Rentel, D. Lecourieux, F. Ouaked, S. L. Usher, L. Petersen, H. Okamoto, H.  
613 Knight, S. C. Peck, C. S. Grierson, H. Hirt, M. R. Knight, OXI1 kinase is necessary for  
614 oxidative burst-mediated signalling in *Arabidopsis*. *Nature*. **427**, 858–861 (2004).
- 615 20. R. G. Anthony, R. Henriques, A. Helfer, T. Mészáros, G. Rios, C. Testerink, T. Munnik,  
616 M. Deák, C. Koncz, L. Bögre, A protein kinase target of a PDK1 signalling pathway is  
617 involved in root hair growth in *Arabidopsis*. *EMBO J.* **23**, 572–581 (2004).
- 618 21. J. Friml, X. Yang, M. Michniewicz, D. Weijers, A. Quint, O. Tietz, R. Benjamins, P. B. F.  
619 Ouwerkerk, K. Ljung, G. Sandberg, P. J. J. Hooykaas, K. Palme, R. Offringa, A  
620 PINOID-dependent binary switch in apical-basal PIN polar targeting directs auxin efflux.  
621 *Science*. **306**, 862–865 (2004).
- 622 22. H. Zegzouti, R. G. Anthony, N. Jahchan, L. Bogre, S. K. Christensen, Phosphorylation  
623 and activation of PINOID by the phospholipid signaling kinase  
624 3-phosphoinositide-dependent protein kinase 1 (PDK1) in *Arabidopsis*. *Proc. Natl. Acad.*  
625 *Sci.* **103**, 6404–6409 (2006).
- 626 23. M. Zourelidou, I. Muller, B. C. Willige, C. Nill, Y. Jikumaru, H. Li, C. Schwechheimer,  
627 The polarly localized D6 PROTEIN KINASE is required for efficient auxin transport in  
628 *Arabidopsis thaliana*. *Development*. **136**, 627–636 (2009).
- 629 24. P. Marhava, A. E. L. Bassukas, M. Zourelidou, M. Kolb, B. Moret, A. Fastner, W. X.  
630 Schulze, P. Cattaneo, U. Z. Hammes, C. Schwechheimer, C. S. Hardtke, A molecular  
631 rheostat adjusts auxin flux to promote root protophloem differentiation. *Nature*. **558**,

- 632 297–300 (2018).
- 633 25. Y. Zhang, J. He, S. McCormick, Two *Arabidopsis* AGC kinases are critical for the  
634 polarized growth of pollen tubes. *Plant J.* **58**, 474–484 (2009).
- 635 26. D. R. Page, U. Grossniklaus, The art and design of genetic screens: *Arabidopsis thaliana*.  
636 *Nat. Rev. Genet.* **3**, 124–136 (2002).
- 637 27. R. S. Allen, K. Nakasugi, R. L. Doran, A. A. Millar, P. M. Waterhouse, Facile mutant  
638 identification via a single parental backcross method and application of whole genome  
639 sequencing based mapping pipelines. *Front. Plant Sci.* **4**, 362 (2013).
- 640 28. T. Csorba, A. Auber, A. Schamberger, The nonstop decay and the RNA silencing  
641 systems operate cooperatively in plants. *Nucleic Acids Res.* **46**, 4632–4648 (2018).
- 642 29. P. Qin, S. Fan, L. Deng, G. Zhong, S. Zhang, M. Li, W. Chen, G. Wang, B. Tu, Y. Wang,  
643 X. Chen, B. Ma, S. Li, LML1 , Encoding a Conserved Eukaryotic Release Factor 1  
644 Protein , Regulates Cell Death and Pathogen Resistance by Forming a Conserved  
645 Complex with SPL33 in Rice. *Plant Cell Physiol.* **59**, 887–902 (2018).
- 646 30. V. P. Pisareva, M. A. Skabkin, C. U. T. Hellen, T. V. Pestova, A. V. Pisarev, Dissociation  
647 by Pelota, Hbs1 and ABCE1 of mammalian vacant 80S ribosomes and stalled elongation  
648 complexes. *EMBO J.* **30**, 1804–1817 (2011).
- 649 31. S. Saito, N. Hosoda, S. I. Hoshino, The Hbs1-Dom34 protein complex functions in  
650 non-stop mRNA decay in mammalian cells. *J. Biol. Chem.* **288**, 17832–17843 (2013).
- 651 32. H. Lange, S. Y. A. Ndecky, C. Gomez-diaz, P. David, N. Butel, J. Zumsteg, L. Kuhn, C.  
652 Piermaria, J. Chicher, M. Christie, E. S. Karaaslan, P. L. M. Lang, D. Weigel, H.  
653 Vaucheret, P. Hammann, D. Gagliardi, RST1 and RIPR connect the cytosolic RNA  
654 exosome to the Ski complex in *Arabidopsis*. *Nat. Commun.* **10**, 3871 (2019).
- 655 33. S. Scholz, J. Pleßmann, B. Enugutti, R. Hüttl, K. Wassmer, K. Schneitz, The AGC  
656 protein kinase UNICORN controls planar growth by attenuating PDK1 in *Arabidopsis*  
657 *thaliana*. *PLoS Genet.* **15**, e1007927 (2019).
- 658 34. L. R. Pearce, D. Komander, D. R. Alessi, The nuts and bolts of AGC protein kinases.  
659 *Nat. Rev. Mol. Cell Biol.* **11**, 9–22 (2010).
- 660 35. H. Zhu, R. G. Kranz, A nitrogen-regulated glutamine amidotransferase (GAT1\_2.1)  
661 represses shoot branching in *Arabidopsis*. *Plant Physiol.* **160**, 1770–1780 (2012).
- 662 36. Y. Gao, A. A. Badejo, Y. Sawa, T. Ishikawa, Analysis of two  
663 L-Galactono-1,4-Lactone-responsive genes with complementary expression during the  
664 development of *Arabidopsis thaliana*. *Plant Cell Physiol.* **53**, 592–601 (2012).
- 665 37. N. Tanaka, H. Uno, S. Okuda, S. Gunji, A. Ferjani, T. Aoyama, M. Maeshima, SRPP, a

- 666 cell wall protein is involved in development and protection of seeds and root hairs in  
667 *Arabidopsis thaliana*. *Plant Cell Physiol.* **58**, 760–769 (2017).
- 668 38. A. K. Boron, J. Van Orden, M. N. Markakis, G. Mouille, D. Adriaensen, J. P. Verbelen,  
669 H. Höfte, K. Vissenberg, Proline-rich protein-like PRPL1 controls elongation of root  
670 hairs in *Arabidopsis thaliana*. *J. Exp. Bot.* **65**, 5485–5495 (2014).
- 671 39. E. Del Campillo, S. Gaddam, D. Mettler-Amuah, J. Heneks, A tale of two tissues:  
672 AtGH9C1 is an endo- $\beta$ -1,4-glucanase involved in root hair and endosperm development  
673 in *Arabidopsis*. *PLoS One.* **7**, e49363 (2012).
- 674 40. C. Ringli, N. Baumberger, B. Keller, The *Arabidopsis* root hair mutants *der2-der9* are  
675 affected at different stages of root hair development. *Plant Cell Physiol.* **46**, 1046–1053  
676 (2005).
- 677 41. R. G. Anthony, R. Henriques, A. Helfer, T. Mészáros, G. Rios, C. Testerink, T. Munnik,  
678 M. Deák, C. Koncz, L. Bögre, A protein kinase target of a PDK1 signalling pathway is  
679 involved in root hair growth in *Arabidopsis*. *EMBO J.* **23**, 572–581 (2004).
- 680 42. B. P. H. J. Thomma, K. Eggermont, B. Mauch-Mani, R. Vogelsang, B. P. A. Cammue, W.  
681 F. Broekaert, Separate jasmonate-dependent and salicylate-dependent defense-response  
682 pathways in *Arabidopsis* are essential for resistance to distinct microbial pathogens.  
683 *Proc. Natl. Acad. Sci. USA.* **95**, 15107–15111 (1998).
- 684 43. M. Tronchet, C. BalaguÉ, T. Kroj, L. Jouanin, D. Roby, Cinnamyl alcohol  
685 dehydrogenases-C and D, key enzymes in lignin biosynthesis, play an essential role in  
686 disease resistance in *Arabidopsis*. *Mol. Plant Pathol.* **11**, 83–92 (2010).
- 687 44. C. C. Chen, W. F. Chien, N. C. Lin, K. C. Yeh, Alternative functions of *Arabidopsis*  
688 *YELLOW STRIPELIKE3*: From metal translocation to pathogen defense. *PLoS One.* **9**,  
689 1–6 (2014).
- 690 45. H. U. Stotz, Y. Sawada, Y. Shimada, M. Y. Hirai, E. Sasaki, M. Krischke, P. D. Brown,  
691 K. Saito, Y. Kamiya, Role of camalexin, indole glucosinolates, and side chain  
692 modification of glucosinolate-derived isothiocyanates in defense of *Arabidopsis* against  
693 *Sclerotinia sclerotiorum*. *Plant J.* **67**, 81–93 (2011).
- 694 46. J. Jung, K. Kumar, H. Y. Lee, Y.-I. Park, H.-T. Cho, S. B. Ryu, Translocation of  
695 phospholipase A2 $\alpha$  to apoplasts is modulated by developmental stages and bacterial  
696 infection in *Arabidopsis*. *Front. Plant Sci.* **3** (2012), p. 126.
- 697 47. H. H. Breitenbach, M. Wenig, F. Wittek, L. Jorda, A. M. Maldonado-Alconada, H.  
698 Sarioglu, T. Colby, C. Knappe, M. Bichlmeier, E. Pabst, D. Mackey, J. E. Parker, A. C.  
699 Vlot, Contrasting roles of apoplastic aspartyl protease AED1 and legume lectin-like

- 700 protein LLP1 in *Arabidopsis* systemic acquired resistance. *Plant Physiol.* **165**, 791–809  
701 (2014).
- 702 48. S. Ferrari, Tandemly duplicated *Arabidopsis* genes that encode  
703 polygalacturonase-inhibiting proteins are regulated coordinately by different signal  
704 transduction pathways in response to fungal infection. *Plant Cell.* **15**, 93–106 (2003).
- 705 49. S. Ferrari, R. Galletti, D. Vairo, F. Cervone, G. De Lorenzo, Antisense expression of the  
706 *Arabidopsis thaliana* *AtPGIP1* gene reduces polygalacturonase-inhibiting protein  
707 accumulation and enhances susceptibility to *Botrytis cinerea*. *Mol. Plant-Microbe*  
708 *Interact.* **19**, 931–936 (2007).
- 709 50. C. Weis, U. Hildebrandt, T. Hoffmann, C. Hemetsberger, S. Pfeilmeier, C. König, W.  
710 Schwab, R. Eichmann, R. Hüchelhoven, CYP83A1 is required for metabolic  
711 compatibility of *Arabidopsis* with the adapted powdery mildew fungus *Erysiphe*  
712 *cruciferarum*. *New Phytol.* **202**, 1310–1319 (2014).
- 713 51. M. Uemura, S. J. Gilmour, M. F. Thomashow, P. L. Steponkus, Effects of COR6.6 and  
714 COR15am polypeptides encoded by *COR* (*Cold-Regulated*) genes of *Arabidopsis*  
715 *thaliana* on the freeze-induced fusion and leakage of liposomes. *Plant Physiol.* **111**,  
716 313–327 (2002).
- 717 52. D. P. Horvath, B. K. Mclarney, M. F. Thomashow, Regulation of *Arabidopsis thaliana* L.  
718 (Heyn) *cor78* in response to low temperature. *Plant Physiol.* **103**, 1047–1053 (1993).
- 719 53. B. C. Dyson, M. A. E. Miller, R. Feil, N. Rattray, C. G. Bowsher, R. Goodacre, J. E.  
720 Lunn, G. N. Johnson, FUM2, a cytosolic fumarase, is essential for acclimation to low  
721 temperature in *Arabidopsis thaliana*. *Plant Physiol.* **172**, 118–127 (2016).
- 722 54. L. Guo, H. Yang, X. Zhang, S. Yang, *Lipid transfer protein 3* as a target of MYB96  
723 mediates freezing and drought stress in *Arabidopsis*. *J. Exp. Bot.* **64**, 1755–1767 (2013).
- 724 55. X. B. Zhang, B. H. Feng, H. M. Wang, X. Xu, Y. F. Shi, Y. He, Z. Chen, A. P. Sathe, L.  
725 Shi, J. L. Wu, A substitution mutation in *OsPELOTA* confers bacterial blight resistance  
726 by activating the salicylic acid pathway. *J. Integr. Plant Biol.* **60**, 160–172 (2018).
- 727 56. T. A. Masters, V. Calleja, D. A. Armoogum, R. J. Marsh, C. J. Applebee, M. Laguerre, A.  
728 J. Bain, B. Larijani, Regulation of 3-phosphoinositide-dependent protein kinase 1  
729 activity by homodimerization in live cells. *Sci. Signal.* **3** (2010), ,  
730 doi:10.1126/scisignal.2000738.
- 731 57. I. M. Adham, M. A. Sallam, G. Steding, M. Korabiowska, U. Brinck, S. Hoyer-fender, C.  
732 Oh, W. Engel, Disruption of the Pelota Gene Causes Early Embryonic Lethality and  
733 Defects in Cell Cycle Progression. *Mol. Cell. Biol.* **23**, 1470–1476 (2003).

- 734 58. M. M. Mahfouz, *Arabidopsis* TARGET OF RAPAMYCIN Interacts with RAPTOR,  
735 Which Regulates the Activity of S6 Kinase in Response to Osmotic Stress Signals. *Plant*  
736 *Cell*. **18** (2006), pp. 477–490.
- 737 59. X. Chen, S. M. Goodwin, X. Liu, X. Chen, R. A. Bressan, M. A. Jenks, Mutation of the  
738 *RESURRECTION1* locus of *Arabidopsis* reveals an association of cuticular wax with  
739 embryo development. *Plant Physiol.* **139**, 909–919 (2005).
- 740 60. T. Li, A. Natran, Y. Chen, J. Vercruyssen, K. Wang, N. Gonzalez, M. Dubois, D. Inzé, A  
741 genetics screen highlights emerging roles for CPL3, RST1 and URT1 in RNA  
742 metabolism and silencing. *Nat. Plants*. **5**, 539–550 (2019).
- 743 61. Q. Zhao, J. Shen, C. Gao, Y. Cui, Y. Wang, J. Cui, L. Cheng, W. Cao, RST1 is a FREE1  
744 suppressor that negatively regulates vacuolar trafficking in *Arabidopsis*. *Plant Cell*  
745 (2019), doi:10.1105/tpc.19.00003.
- 746 62. B. M. Waters, H.-H. Chu, R. J. DiDonato, L. A. Roberts, R. B. Eisley, B. Lahner, D. E.  
747 Salt, E. L. Walker, Mutations in *Arabidopsis* *Yellow Stripe-Like1* and *Yellow*  
748 *Stripe-Like3* reveal their roles in metal ion homeostasis and loading of metal ions in  
749 seeds. *Plant Physiol.* **141**, 1446–1458 (2006).
- 750 63. T. Shimada, K. Yamada, M. Kataoka, S. Nakaune, Y. Koumoto, M. Kuroyanagi, S.  
751 Tabata, T. Kato, K. Shinozaki, M. Seki, M. Kobayashi, M. Kondo, M. Nishimura, I.  
752 Hara-Nishimura, Vacuolar processing enzymes are essential for proper processing of  
753 seed storage proteins in *Arabidopsis thaliana*. *J. Biol. Chem.* **278**, 32292–32299 (2003).
- 754 64. Q. Li, B.-C. Wang, Y. Xu, Y.-X. Zhu, Systematic studies of 12S seed storage protein  
755 accumulation and degradation patterns during *Arabidopsis* seed maturation and early  
756 seedling germination stages. *BMB Rep.* **40**, 373–381 (2011).
- 757 65. X. Tang, M. H. Lim, J. Pelletier, M. Tang, V. Nguyen, W. A. Keller, E. W. T. Tsang, A.  
758 Wang, S. J. Rothstein, J. J. Harada, Y. Cui, Synergistic repression of the embryonic  
759 programme by SET DOMAIN GROUP 8 and EMBRYONIC FLOWER 2 in  
760 *Arabidopsis* seedlings. *J. Exp. Bot.* **63**, 1391–1404 (2012).
- 761 66. M. K. Choy, J. A. Sullivan, J. C. Theobald, W. J. Davies, J. C. Gray, An *Arabidopsis*  
762 mutant able to green after extended dark periods shows decreased transcripts of seed  
763 protein genes and altered sensitivity to abscisic acid. *J. Exp. Bot.* **59**, 3869–3884 (2008).
- 764 67. T. Umezawa, Y. Fujita, T. Furihata, K. Maruyama, K. Yamaguchi-Shinozaki, K.  
765 Shinozaki, R. Yoshida, Abscisic acid-dependent multisite phosphorylation regulates the  
766 activity of a transcription activator AREB1. *Proc. Natl. Acad. Sci.* **103**, 1988–1993  
767 (2006).



- 768 68. L. Li, T. Shimada, H. Takahashi, H. Ueda, Y. Fukao, M. Kondo, M. Nishimura, I.  
769 Hara-Nishimura, MAIGO2 is involved in exit of seed storage proteins from the  
770 endoplasmic reticulum in *Arabidopsis thaliana*. *Plant Cell*. **18**, 3535–3547 (2006).
- 771 69. K. Müntz, Deposition of storage proteins. *Plant Mol. Biol.* **38**, 77–99 (1998).
- 772 70. J. M. Alonso, T. Curran, R. Hawkes, P. Soriano, J. A. Cooper, J. W. Lichtman, B. Bernier,  
773 A. M. Goffinet, M. Derer, A. Goffinet, M. J. Galazo, C. Cavada, J. A. Conchello, L. T.  
774 Landmesser, R. D. Fields, B. W. Festoff, P. G. Nelson, I. V Smirnova, B. A. Citron,  
775 Genome-wide insertional mutagenesis of *Arabidopsis thaliana*. *Science*. **301**, 653–657  
776 (2003).
- 777 71. S. J. Clough, A. F. Bent, Floral dip: A simplified method for *Agrobacterium*-mediated  
778 transformation of *Arabidopsis thaliana*. *Plant J.* **16**, 735–743 (1998).
- 779 72. W. Liu, Z. H. Xu, D. Luo, H. W. Xue, Roles of OsCKI1, a rice casein kinase I, in root  
780 development and plant hormone sensitivity. *Plant J.* **36**, 189–202 (2003).
- 781 73. S.-T. Tan, H.-W. Xue, Casein Kinase 1 Regulates Ethylene Synthesis by  
782 Phosphorylating and Promoting the Turnover of ACS5. *Cell Rep.* **9** (2014),  
783 doi:10.1016/j.celrep.2014.10.047.
- 784 74. S. Nakamura, S. Mano, Y. Tanaka, M. Ohnishi, C. Nakamori, M. Araki, T. Niwa, M.  
785 Nishimura, H. Kaminaka, T. Nakagawa, Y. Sato, S. Ishiguro, Gateway binary vectors  
786 with the bialaphos resistance gene, bar, as a selection marker for plant transformation.  
787 *Biosci. Biotechnol. Biochem.* **74**, 1315–1319 (2010).
- 788 75. B. K. Nelson, X. Cai, A. Nebenführ, A multicolored set of *in vivo* organelle markers for  
789 co-localization studies in *Arabidopsis* and other plants. *Plant J.* **51**, 1126–1136 (2007).
- 790 76. D. Lin, S. Nagawa, J. Chen, L. Cao, X. Chen, T. Xu, H. Li, P. Dhonukshe, C. Yamamuro,  
791 J. Friml, B. Scheres, Y. Fu, Z. Yang, A ROP GTPase-dependent auxin signaling pathway  
792 regulates the subcellular distribution of PIN2 in *Arabidopsis* roots. *Curr. Biol.* **22**, 1319–  
793 1325 (2012).
- 794 77. B. J. Yang, X. X. Han, L. L. Yin, M. Q. Xing, Z. H. Xu, H. W. Xue, *Arabidopsis*  
795 *PROTEASOME REGULATORY1* is required for auxin-mediated suppression of  
796 proteasome activity and regulates auxin signalling. *Nat. Commun.* **7**, 11388 (2016).
- 797 78. J. Zhang, T. Nodzynski, A. Pencik, J. Rolcik, J. Friml, PIN phosphorylation is sufficient  
798 to mediate PIN polarity and direct auxin transport. *Proc. Natl. Acad. Sci.* **107**, 918–922  
799 (2010).
- 800 79. A. Thompson, J. Schäfer, K. Kuhn, S. Kienle, J. Schwarz, G. Schmidt, T. Neumann, R.  
801 Johnstone, A. K. A. Mohammed, C. Hamon, Tandem mass tags: a novel quantification

802 strategy for comparative analysis of complex protein mixtures by MS/MS. *Anal. Chem.*  
803 **75** (2003), pp. 1895–904.

804 80. J. Schindelin, I. Arganda-Carreras, E. Frise, V. Kaynig, M. Longair, T. Pietzsch, S.  
805 Preibisch, C. Rueden, S. Saalfeld, B. Schmid, J. Y. Tinevez, D. J. White, V. Hartenstein,  
806 K. Eliceiri, P. Tomancak, A. Cardona, Fiji: An open-source platform for  
807 biological-image analysis. *Nat. Methods.* **9**, 676–682 (2012).

808

809 **Figure legends**

810

811 **Fig. 1 | The *sop21* mutation or deficiency of *PEL1* or *HBS1* restores the growth defects**  
812 **of *Arabidopsis* *pdk1.1 pdk1.2* mutants.**

813 A. The *sop21* mutation or loss of function of *PEL1* or *HBS1* suppresses the growth defect of  
814 *pdk1.1 pdk1.2*, including the reduced growth and delayed bolting. 3- or 5-week-old Col-0,  
815 *pdk1.1 pdk1.2*, *pdk1.1 pdk1.2 pel1*, *pdk1.1 pdk1.2 sop21* (*pdk1.1 pdk1.2 pel1*<sup>W27\*</sup>), *pdk1.1*  
816 *pdk1.2 hbs1* and various mutant plants are shown. Scale bar, 5 cm. b. Short siliques and  
817 low setting rate, Scale bars, 2 cm (upper) or 1 mm (lower), defective/abnormal seeds of  
818 *pdk1.1 pdk1.2* are highlighted.

819 B. Quantification of the silique length. n = 37, 36, 17, 54, and 51, respectively. Different  
820 letters represent significant difference,  $P < 0.05$ , by one-way analysis of variance  
821 (ANOVA) with a Tukey multiple comparison test.

822 C. Defective root elongation and lateral root formation, 2-week-old seedlings, Scale bar, 1  
823 cm). Representative images are shown.

824 D. Length of primary root and number of emerged lateral roots of 2-week-old seedlings were  
825 calculated. Data are presented as means  $\pm$  SD (n > 30). n = 56, 65, 52, 62, and 30,  
826 respectively. Different letters represent significant difference,  $P < 0.05$ , by one-way  
827 analysis of variance (ANOVA) with a Tukey multiple comparison test.

828 E. Number of emerged lateral roots of two-week-old seedlings were counted. and  
829 statistically analyzed by student's *t*-test (\*\*,  $p < 0.01$ ). Data are presented as means  $\pm$  SD  
830 (n > 30). n = 61, 65, 63, 63, and 52, respectively. Different letters represent significant  
831 difference,  $P < 0.01$ , by one-way ANOVA with a Tukey multiple comparison test.

832

833 **Fig. 2 | Subcellular localizations of PEL1 and PDK1.1.**

834 A. Stable transgenic lines revealed that PEL1 localized to the cytoplasm and nucleus, and  
835 that PDK1.1-GFP and PDK1.2-GFP resided at PM and cytoplasm. Five-day-old  
836 *35S::PEL1-GFP*, *35S::mCherry-PEL1*, *35S::PDK1.1-GFP* and *35S::PDK1.2-GFP*  
837 seedlings were observed by CLSM. The “Green Fire Blue” LUT was used for GFP, and  
838 “mpl-inferno” LUT was used for mCherry, visualizations respectively, based on  
839 fluorescence intensity by Fiji. Scale bars, 20  $\mu$ m.

840 B-E. Fluorescence observations showed that both PEL1 (b, c) and PDK1.1 (d, e) localized to  
841 certain cytoplasm compartments associated with the endoplasmic reticulum (ER).  
842 Fusion proteins PEL1-GFP (b, c) and PDK1.1-GFP (d, e) were transiently expressed

843 with ER-specific GFP-HDEL proteins in tobacco leaves. Samples were observed 48  
844 hours after infiltration. Scale bars, 20  $\mu$ m. Lower panels are enlarged view of the  
845 squared region of the upper panels. The position for quantification (right panels) was  
846 indicated with dashed lines across the images.

847

848 **Fig. 3 | PEL1 forms a complex with HBS1.**

849 A-B. Yeast two-hybrid (A) and bimolecular fluorescence complementation (BiFC, B)  
850 analysis reveals the interactions of PEL1 with HBS1. PEL1 and HBS1 was fused to  
851 GAL4 DNA-binding domain (BD) or activation domain (AD) respectively. Protein  
852 interaction was examined on synthetic dropout (-Leu/-Trp/-His) medium supplemented  
853 with 0.5 mg/ml X- $\alpha$ -Gal or synthetic dropout (-Leu/-Trp/-His-Ade) medium. For BiFC  
854 analysis, PEL1-nYFP or HBS1-cYFP fusion proteins were transiently expressed in *N.*  
855 *benthamiana* leaves through infiltration and observed. Scale bars, 50  $\mu$ m.

856 C. GST pull-down analysis reveals the interactions of PEL1 with HBS1. GST and  
857 GST-HBS1 fusion protein were used as baits, and 6XHis-PEL1 fusion protein was used as  
858 prey. Pulled-down fractions were analyzed by Western blot using anti-His and anti-GST  
859 antibodies.

860

861 **Fig. 4 | Increased expression of truncated *PDK1* transcripts in the *pdk1.1 pdk1.2 pel1* or  
862 *pdk1.1 pdk1.2 hbs1* background accounts for the rescued phenotypes.**

863 A-B. RT-qPCR analysis with primers across T-DNA insertions revealed that the integrity of  
864 *PDK1.1* and *PDK1.2* full-length CDS was disrupted by the T-DNA insertions in *pdk1.1*  
865 *pdk1.2*, *pdk1.1 pdk1.2 sop21*, *pdk1.1 pdk1.2 pel1* and *pdk1.1 pdk1.2 hbs1*, respectively.  
866 *ACTIN7* gene was amplified and used as an internal control. Experiments were  
867 biologically repeated 3 times and data are presented as means  $\pm$  SD. n = 3. Different  
868 letters represent significant difference,  $P < 0.05$ , by one-way ANOVA with a Tukey  
869 multiple comparison test.

870 C-D. RT-qPCR analysis with primers in front of T-DNA insertions revealed that N-terminal  
871 fragments of *PDK1.1* and *PDK1.2* transcripts (PDK1.1N and PDK1.2N) exhibited  
872 increased levels in *pdk1.1 pdk1.2 sop21*, *pdk1.1 pdk1.2 pel1* and *pdk1.1 pdk1.2 hbs1*,  
873 respectively, compared to that in *pdk1.1 pdk1.2*. *ACTIN7* gene was used as an internal  
874 control. Experiments were biologically repeated 3 times and data are presented as means  
875  $\pm$  SD. n = 3. Different letters represent significant difference,  $P < 0.05$ , by one-way  
876 ANOVA with a Tukey multiple comparison test.

877 E. Native promoter-driven expression of PDK1 N-terminal fragment partially rescued the  
878 growth defects of *pdk1.1 pdk1.2*. A representative photo of 20-day-old Col-0, *pdk1.1*  
879 *pdk1.2*, and *pPDK1.1::mCherry-PDK1.1N* (in *pdk1.1 pdk1.2*) plants grown in soil are  
880 shown. Scale bar, 2 cm.

881

882 **Fig. 5 | Comparative proteomics showing the functions of PDK1 and PEL1 in shaping**  
883 **the whole proteomes in *Arabidopsis*.**

884 Heat map displayed the abundance of 54 RCEs (restored CE proteins) in shoots (A) and 49  
885 RCEs in roots (B) of wild type Col-0, *pdk1.1 pdk1.2* and *pdk1.1 pdk1.2 pel1*. “PP” refers to  
886 *pdk1.1 pdk1.2* double mutant and “3P” refers to *pdk1.1 pdk1.2 pel1* triple mutant. Three  
887 independent samples of WT (WT-1, 2, 3), *pdk1.1 pdk1.2* (PP-1, 2, 3) and *pdk1.1 pdk1.2 pel1*  
888 (3P-1, 2, 3) were collected and analyzed. Heat maps were generated using *log2*-transformed  
889 TMT values. Relative expression of the analyzed proteins was used to perform the  
890 hierarchical clustering analysis using Cluster3.0  
891 (<http://bonsai.hgc.jp/~mdehoon/software/cluster/software.htm>) and Java Treeview software  
892 (<http://jtreeview.sourceforge.net>).

893

894 **Fig. 6 | A proposed model showing the function of PEL1-HBS1 mRNA surveillance**  
895 **complex and how *sop21* suppresses *pdk1.1 pdk1.2* phenotypes.**

896 A. The PEL1-HBS1 complex regulates 80S ribosomes through translational surveillance to  
897 maintain the normal protein translation and plant growth. In the case of truncated *PDK1*  
898 transcripts in *pdk1.1 pdk1.2*, this complex could degrade these mRNAs without stop  
899 codon, thus promoting the recycling of stalled 80S ribosomes. A-site, ribosomal site most  
900 frequently occupied by aminoacyl-tRNA, which functions as acceptor for growing protein  
901 during peptide bond formation; P-site, ribosomal site most frequently occupied by  
902 peptidyl-tRNA, the tRNA carrying the chain of growing peptide; E-site, ribosomal site  
903 harbouring decylated tRNA on transit out from ribosome.

904 B. A proposed model showing *sop21* mutation rescuing the defects of *pdk1.1 pdk1.2*: 1) In  
905 WT, the PDK1 transcripts have the stop codon, and it can be translated into 100% of  
906 PDK1 protein. 2) In the *pdk1.1 pdk1.2* T-DNA mutants, aberrant transcripts with fusion to  
907 partial T-DNA fragment will be recognized by the PEL1-HBS1 complex and thus get  
908 degraded, exhibiting PDK1 loss-of-function mutant defects. 3) The *sop21* mutations leads  
909 to the inefficient degradation of aberrant transcripts, which produce enough truncated  
910 PDK1 protein, maintaining normal growth of *pdk1.1 pdk1.2* plants.

911 **Table 1. Identified RCEs (restored CE proteins) by analyzing Col-0, *pdk1.1 pdk1.2*,**  
 912 ***pdk1.1 pdk1.2 pel1* mutants.** Proteins were functionally categorized by KEGG pathway  
 913 analysis and previous studies. In, increased; De, decreased.  
 914

| Category                                        | Definition                   | RCE Proteins                                            | <i>pdk1.1</i><br><i>pdk1.2</i> |    |
|-------------------------------------------------|------------------------------|---------------------------------------------------------|--------------------------------|----|
| Metabolisms                                     | Lipid metabolism             | Phospholipase A2 family protein PLA2 $\alpha$           | De                             |    |
|                                                 |                              | Lipoxygenase LOX2                                       | In                             |    |
|                                                 |                              | Lipid transport superfamily protein AT1G23130           | In                             |    |
|                                                 |                              | Lipid transfer protein LTP3                             | In                             |    |
|                                                 | Carbohydrate metabolism      | Fumarase FUM2                                           | In                             |    |
|                                                 |                              | Galactose mutarotase-like protein AT3G47800             | In                             |    |
|                                                 |                              | Alpha-galactosidase AGAL1                               | In                             |    |
|                                                 |                              | Xyloglucan endotransglucosylase/hydrolase XTH5          | In                             |    |
|                                                 | Phenylpropanoid biosynthesis | Cinnamyl alcohol dehydrogenase CAD D                    | In                             |    |
|                                                 |                              | Peroxidase superfamily proteins AT1G34510               | In                             |    |
|                                                 |                              | Peroxidase superfamily proteins PER4                    | In                             |    |
|                                                 |                              | Peroxidase superfamily proteins AT3G49960               | In                             |    |
|                                                 | Amino acid metabolism        | Asparagine synthetase ASN3                              | De                             |    |
|                                                 |                              | D-site 20S pre-rRNA nuclease AT5G41190                  | De                             |    |
| Development                                     | Shoot branching              | Nitrogen-regulated glutamine amidotransferase GAT 1_2.1 | In                             |    |
|                                                 | Root and rosette             | DUF 642 family proteins DGR1                            | In                             |    |
|                                                 |                              | DUF 642 family proteins DGR2                            | In                             |    |
|                                                 | Root hair                    | Root hair specific 13 SRPP                              | In                             |    |
|                                                 |                              | Proline-riched protein-like 1 PRPL1                     | In                             |    |
|                                                 |                              | Glycosyl hydrolase 9C1 AtGH9C1                          | In                             |    |
|                                                 |                              | Deformed root hair 9 DER9                               | In                             |    |
|                                                 | Embryo                       | Embryo defective 1923 (EMB1923)                         | De                             |    |
|                                                 |                              | Resurrection1 RST1                                      | In                             |    |
|                                                 |                              | Yellow stripe like 3 (YSL3)                             | In                             |    |
|                                                 | Chloroplast                  | Chloroplast division-related protein FAD6               | De                             |    |
|                                                 |                              | Chloroplast grana formation-related protein GDC1        | De                             |    |
|                                                 | Stress                       | Pathogen-induced defense / systemic acquired resistance | Pathogenesis-related 3 PR3     | In |
|                                                 |                              |                                                         | Pathogenesis-related 4 PR4     | In |
| Cinnamyl alcohol dehydrogenase CAD D            |                              |                                                         | In                             |    |
| Yellow stripe like 3 (YSL3)                     |                              |                                                         | In                             |    |
| Flavin-binding monooxygenase family protein FMO |                              |                                                         | In                             |    |
| Phospholipase A2 family protein PLA2 $\alpha$   |                              |                                                         | De                             |    |
| Legume lectin family protein LLP1               |                              |                                                         | In                             |    |
| Polygalacturonase inhibiting protein 2 AtPGIP2  |                              |                                                         | In                             |    |
| Polygalacturonase inhibiting protein 1 AtPGIP1  |                              |                                                         | In                             |    |
| CYP83A1                                         |                              |                                                         | In                             |    |
| Cold                                            |                              | Cold-responsive protein 6.6 COR6.6                      | In                             |    |
|                                                 |                              | Cold-responsive protein 78 COR78                        | In                             |    |
|                                                 |                              | Fumarase 2 FUM2                                         | In                             |    |

|                       |                                         |                                   |                                             |    |
|-----------------------|-----------------------------------------|-----------------------------------|---------------------------------------------|----|
|                       |                                         | Lipid transfer protein 3 LTP3     | In                                          |    |
| Seed storage proteins | 2S albumin                              | 2S seed storage protein 1 AT2S126 | In                                          |    |
|                       |                                         | 2S seed storage protein 3 AT2S3   | In                                          |    |
|                       |                                         | 2S seed storage protein 4 AT2S4   | In                                          |    |
|                       |                                         | 2S seed storage protein 5 AT2S5   | In                                          |    |
|                       |                                         | 12S globulin                      | Vicilin-like seed storage protein AT4G36700 | In |
|                       |                                         | Cruciferin A CRA1                 | In                                          |    |
|                       |                                         | Cruciferin B CRB                  | In                                          |    |
|                       |                                         | Cruciferin 2 CRU2                 | In                                          |    |
|                       |                                         | Cruciferin 3 CRC                  | In                                          |    |
|                       | Other nutrient reserve-related proteins |                                   | lipid transfer protein LTP3                 | In |
|                       |                                         |                                   | Lipoxygenase protein LOX2                   | In |
|                       |                                         |                                   | Oleosin OLE2                                | In |
|                       |                                         |                                   | Seed-specific protein AT2G05580             | In |

915

916

917 **Supplemental information includes 11 figures and 2 Tables, which are available online.**

918

919 **Legends of Supplementary figures**

920

921 **Supplementary Fig. 1 Expression profiles of *PDK1.1* and *PDK1.2*.**

922 A. Reverse transcription-quantitative PCR (RT-qPCR) analysis reveals the expression of  
923 *PDK1.1* and *PDK1.2* in various tissues. *ACTIN7* gene was amplified and used as an  
924 internal control. Experiments were biologically repeated 3 times and data are presented as  
925 means  $\pm$  SD (standard derivation).  $n = 3$ . Different letters represent significant difference,  
926  $P < 0.05$ , by one-way ANOVA with a Tukey multiple comparison test.

927 B-M. Promoter-reporter gene (*GUS*) fusion studies show the expression of *PDK1.1* in  
928 7-day-old seedlings (B) including shoot apical meristem (SAM, C), cotyledon (D),  
929 primary root tip (E), lateral root (J) and floral tissues (mainly in pollens, L); and similar  
930 expression pattern of *PDK1.2* (F-I, K, M). Scale bars, 2 mm (B, F), 500  $\mu\text{m}$  (D, H, L, M),  
931 200  $\mu\text{m}$  (C, G, E, I) or 100  $\mu\text{m}$  (J, K). Transgenic lines were confirmed and three  
932 independent lines were analyzed. Representative images are shown.

933

934 **Supplementary Fig. 2 Identification of the *pell* mutant.**

935 A. Schematic representation of *PEL1* gene and position of T-DNA insertion. Introns, exons  
936 and non-coding regions are indicated by lines, black or blank boxes. Positions of primers  
937 are indicated.

938 B. Identification of homozygous *pell* mutant. Genomic DNAs were used as template for  
939 PCR amplification and homozygous lines presents a single amplified fragment when  
940 using LBa1/PEL1-RP primers.

941 C. RT-qPCR analysis confirmed the deficient *PEL1* expression in *pell*. Total RNA of  
942 7-day-old Col-0 and *pell* seedlings was extracted and used for analysis. *ACTIN7* gene  
943 was amplified and used as an internal control. Experiments were biologically repeated 3  
944 times and data are presented as means  $\pm$  SD.  $n = 3$ .  $P$  value was calculated by an unpaired  
945 Student's t-test.

946 D. Quantification of the rosette area revealed that *pell* mutations partially rescued the  
947 phenotype of *pdk1.1 pdk1.2*.  $n = 16, 21, 15, 16$ , and  $12$ , respectively. Different letters  
948 represent significant difference,  $P < 0.05$ , by one-way analysis of variance (ANOVA)  
949 with a Tukey multiple comparison test.

950 E-F. A representative photo showed that the *pell* mutations partially rescued the



951 inflorescence phenotype of *pdk1.1 pdk1.2*. Scale bars, 2 cm.

952

953 **Supplementary Fig. 3 Expression profiles of *PEL1*.**

954 A. RT-qPCR analysis revealed the *PEL1* expression in various tissues. *Actin7* gene was  
955 amplified and used as an internal control. Experiments were biologically repeated 3 times  
956 and data are presented as means  $\pm$  SD. n = 3. Different letters represent significant  
957 difference,  $P < 0.05$ , by one-way ANOVA with a Tukey multiple comparison test.

958 B-G. Promoter-reporter gene (GUS) fusion studies reveals the *PEL1* expression in 7-day-old  
959 seedlings (B) including primary roots (C), shoots (D) and lateral roots (E), 21-day-old  
960 seedlings (F), and floral organs (G). Transgenic lines were confirmed and three  
961 independent lines were analyzed. Scale bars, 2 mm (B), 200  $\mu$ m (C), 500  $\mu$ m (D, G), 100  
962  $\mu$ m (E), or 1 cm (F). Representative images are shown.

963

964 **Supplementary Fig. 4 Loss of function of *PEL1* suppresses the defective growth of**  
965 ***pdk1.1 pdk1.2*, confirmed by complementation.**

966 A. Western blot analysis confirms the *PEL1-FLAG* expression in *pdk1.1 pdk1.2 sop21*  
967 transgenic lines. An anti-FLAG (upper panel) and an anti-Actin (bottom panel) antibody  
968 was used respectively.

969 B. Expression of PEL1 protein in *sop21* plants restored the phenotype of *pdk1.1 pdk1.2*.  
970 Five- (top) or three- (bottom) week-old Col-0, *pdk1.1 pdk1.2*, *pdk1.1 pdk1.2 sop21* and  
971 *35S::PEL1-FLAG* (in *pdk1.1 pdk1.2 sop21*) plants were observed and shown. Scale bars,  
972 2 cm.

973 C. Western blot analysis confirmed the PEL1-FLAG protein expression in Col-0 background.  
974 An anti-FLAG (upper panel) and an anti-Actin (bottom panel) antibody was used  
975 respectively.

976 D. Overexpression of *PEL1* did not show any obvious phenotypes. Five- (top) or three-  
977 (bottom) week-old Col-0 and *35S::PEL1-FLAG* (in Col-0) plants were observed and  
978 representative photos are shown. Scale bars, 2 cm.

979

980 **Supplementary Fig. 5 Sequence alignment among *Arabidopsis thaliana* HBS1, *Homo***  
981 ***sapiens* HBS1 and *Saccharomyces cerevisiae* HBS1.** Protein sequences were obtained from  
982 NCBI, including AtHBS1 (AED91575.1), HsHBS1 (NP\_006611.1) and ScHBS1  
983 (CAA82163.1). Alignment was performed using the DNAMAN Software with default  
984 settings. The three orthologues show 38.60% identity. The similarity was shown in different

985 colours: back, 100% identity; grey,  $\geq 75\%$ .

986

987 **Supplementary Fig. 6 Identification of *hbs1* mutants.**

988 A. RT-qPCR analysis reveals the *HBS1* expression in various tissues. *Actin7* gene was  
989 amplified and used as an internal control. Experiments were biologically repeated 3 times  
990 and data are presented as means  $\pm$  SD.  $n = 3$ . Different letters represent significant  
991 difference,  $P < 0.05$ , by one-way ANOVA with a Tukey multiple comparison test.

992 B. Schematic representation of *HBS1* gene and position of T-DNA insertion. Introns, exons  
993 and non-coding regions are indicated by lines, black or blank boxes. Positions of primers  
994 are indicated.

995 C. Identification of homozygous *hbs1* mutant. Genomic DNA was used as template for PCR  
996 amplification and homozygous lines presents a single amplified fragment when using  
997 P745/HBS1-LP primers.

998 D. RT-qPCR analysis confirmed the significantly reduced *HBS1* expression in *hbs1* mutant.  
999 Total RNAs of 7-day-old WT and *hbs1* seedlings were extracted and used for analysis.  
1000 *ACTIN7* gene was amplified and used as an internal control. Experiments were  
1001 biologically repeated 3 times and data are presented as means  $\pm$  SD.  $P$  value was  
1002 calculated by an unpaired Student's t-test.

1003

1004 **Supplementary Fig. 7 Phenotype of multiple combinations of *pdk1.1 pdk1.2* double**  
1005 **mutants.**

1006 A-B. A schematic picture showing the positions of T-DNA insertions in various alleles of  
1007 *pdk1.1* and *pdk1.2*. The primers used for genotyping *pdk1.1* (*pdk1.2-2*) and *pdk1.2*  
1008 (*pdk1.2-4*) and RT-qPCR analysis are also indicated with arrows.

1009 C. A representative photo showing the phenotype of different combinations of *pdk1.1 pdk1.2*  
1010 double mutants. 25 days old. Scale bar, 2 cm.

1011

1012 **Supplementary Fig. 8 Increased expression of PDK1 N-terminal fragments rescued the**  
1013 **growth defects of *pdk1.1 pdk1.2*.**

1014 A. Semi-quantitative RT-PCR analysis with primers targeting the N-terminal fragments  
1015 (before T-DNA insertions) revealed that N-terminal fragments of *PDK1.1* and *PDK1.2*  
1016 transcript (*PDK1.1N* and *PDK1.2N*) exhibited increased levels in *pdk1.1 pdk1.2 sop21*,  
1017 *pdk1.1 pdk1.2 pell* and *pdk1.1 pdk1.2 hbs1*, respectively, compared to that in *pdk1.1*  
1018 *pdk1.2*. *ACTIN7* gene was amplified and used as an internal control (bottom).

1019 B. CaMV 35S-driven overexpression of PDK1 N-terminal fragment rescued the growth  
1020 defects of *pdk1.1 pdk1.2*. A representative photo of 20-day-old Col-0, *pdk1.1 pdk1.2*,  
1021 *35S::Venus-PDK1.1*, *35S::Venus-PDK1.2*, *35S::Venus-PDK1.1N*, *35S::Venus-PDK1.2N*,  
1022 *35S::Venus-PDK1.1C* and *35S::Venus-PDK1.2C* plants (all in *pdk1.1 pdk1.2* background)  
1023 grown in soil are shown. Scale bar, 2 cm.

1024

1025 **Supplementary Fig. 9 Subcellular localization of PDK1.1-YFP, PDK1.2-YFP,**  
1026 **PEL1-YFP, and HBS1-YFP.**

1027 A-C. Fusion proteins PDK1.1-YFP, PDK1.2-YFP, PEL1-YFP, and HBS1-YFP were  
1028 transiently expressed in *Arabidopsis* leaf protoplasts and fluorescence were observed (a).  
1029 Endoplasmic reticulum-specific ER-mCherry (a), plasma membrane-specific PIP2-RFP  
1030 (b), and nuclear-specific dye DAPI (c) were used to confirm the location at plasma  
1031 membrane, endoplasmic reticulum, or nucleus. Scale bars, 10  $\mu$ m.

1032 D. Western blot revealing the integrity of PDK1.1-GFP protein in *35S::PDK1.1-GFP*  
1033 transgenic plants. Upper panel, anti-GFP antibody; bottom, Ponceau stain.

1034 E. Fluorescence observations show the endoplasmic reticulum localization of PDK1.1,  
1035 PDK1.2, PEL1 and HBS1. Fusion proteins PDK1.1-GFP, PDK1.2-GFP, PEL1-GFP and  
1036 HBS1-GFP were transiently expressed with ER-specific ER-mCherry proteins in tobacco  
1037 leaves. Scale bars, 50  $\mu$ m.

1038

1039 **Supplementary Fig. 10 PDK1 doesn't affect the amounts of PEL1 and HBS1 proteins.**

1040 Abundance of PEL1 and HBS1 proteins is not changed in roots of 14-day-old *pdk1.1 pdk1.2*  
1041 seedlings by TMT-based comparative proteomics analysis. "PP" refers to *pdk1.1 pdk1.2*  
1042 double mutant and three independent samples of WT (WT-1, WT-2, WT-3) and *pdk1.1*  
1043 *pdk1.2* (PP-1, PP-2, PP-3) were collected and analyzed. Heat maps were generated using  
1044 *log*<sub>2</sub>-transformed TMT values. Relative amount of PEL1 and HBS1 proteins was used to  
1045 perform the hierarchical clustering analysis using Cluster3.0  
1046 (<http://bonsai.hgc.jp/~mdehoon/software/cluster/software.htm>) and Java Treeview software  
1047 (<http://jtreeview.sourceforge.net>). Euclidean distance algorithm for similarity measure and  
1048 average linkage clustering algorithm (clustering uses the centroids of observations) for  
1049 clustering were selected when performing hierarchical clustering.

1050

1051 **Supplementary Fig. 11 Abundance of AGC protein kinases in *pdk1.1 pdk1.2* or *pdk1.1***  
1052 ***pdk1.2 pel1*.**

1053 Abundance of the AGC family of proteins detected in shoots (A) or roots (B) of 14-day-old  
1054 *pdk1.1 pdk1.2* and *pdk1.1 pdk1.2 pell* seedlings by TMT-based comparative proteomics  
1055 analysis. Data are presented as means  $\pm$  SD. n = 3. Different letters represent significant  
1056 difference,  $P < 0.05$ , by one-way ANOVA with a Tukey multiple comparison test.

1057

1058 **Table S1 | Candidate HBS1 proteins in *Arabidopsis thaliana* by homologous analysis**  
1059 **using *Saccharomyces cerevisiae* HBS1 (ScHBS1) and *Homo sapiens* HBS1 (HsHBS1L).**

1060 Top five *Arabidopsis* homologs of ScHBS1 and HsHBS1L are shown and corresponding  
1061 properties were obtained through the TAIR website (<http://www.arabidopsis.org/>).

1062

1063 **Table S2 | Primers used in this study.** Added restriction enzymes are indicated and  
1064 underlined.

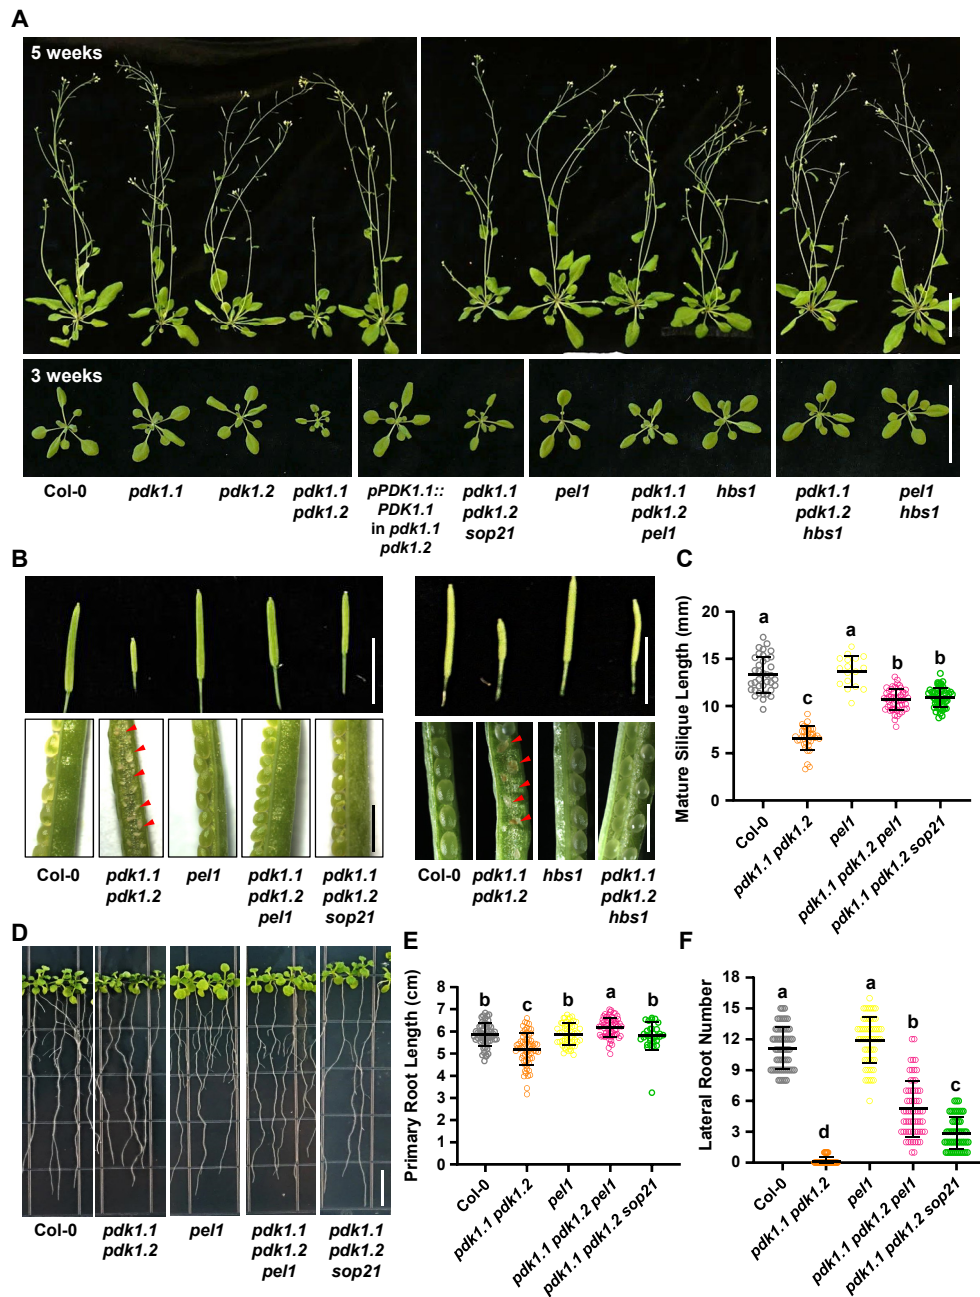

**Fig. 1 | The *sop21* mutation or deficiency of *PEL1* or *HBS1* restores the growth defects of *Arabidopsis pdk1.1 pdk1.2* mutants.**

- A. The *sop21* mutation or loss of function of *PEL1* or *HBS1* suppresses the growth defect of *pdk1.1 pdk1.2*, including the reduced growth and delayed bolting. 3- or 5-week-old Col-0, *pdk1.1 pdk1.2*, *pdk1.1 pdk1.2 pel1*, *pdk1.1 pdk1.2 sop21* (*pdk1.1 pdk1.2 pel1<sup>W27\*</sup>*), *pdk1.1 pdk1.2 hbs1* and various mutant plants are shown. Scale bar, 5 cm. b. Short siliques and low setting rate, Scale bars, 2 cm (upper) or 1 mm (lower), defective/abnormal seeds of *pdk1.1 pdk1.2* are highlighted.
- B. Quantification of the silique length.  $n = 37, 36, 17, 54,$  and  $51,$  respectively. Different letters represent significant difference,  $P < 0.05,$  by one-way analysis of variance (ANOVA) with a Tukey multiple comparison test.
- C. Defective root elongation and lateral root formation, 2-week-old seedlings, Scale bar, 1 cm). Representative images are shown.
- D. Length of primary root and number of emerged lateral roots of 2-week-old seedlings were calculated. Data are presented as means  $\pm$  SD ( $n > 30$ ).  $n = 56, 65, 52, 62,$  and  $30,$  respectively. Different letters represent significant difference,  $P < 0.05,$  by one-way analysis of variance (ANOVA) with a Tukey multiple comparison test.
- E. Number of emerged lateral roots of two-week-old seedlings were counted. and statistically analyzed by student's *t*-test (\*\*,  $p < 0.01$ ). Data are presented as means  $\pm$  SD ( $n > 30$ ).  $n = 61, 65, 63, 63,$  and  $52,$  respectively. Different letters represent significant difference,  $P < 0.01,$  by one-way ANOVA with a Tukey multiple comparison test.

Kong et al., Figure 2

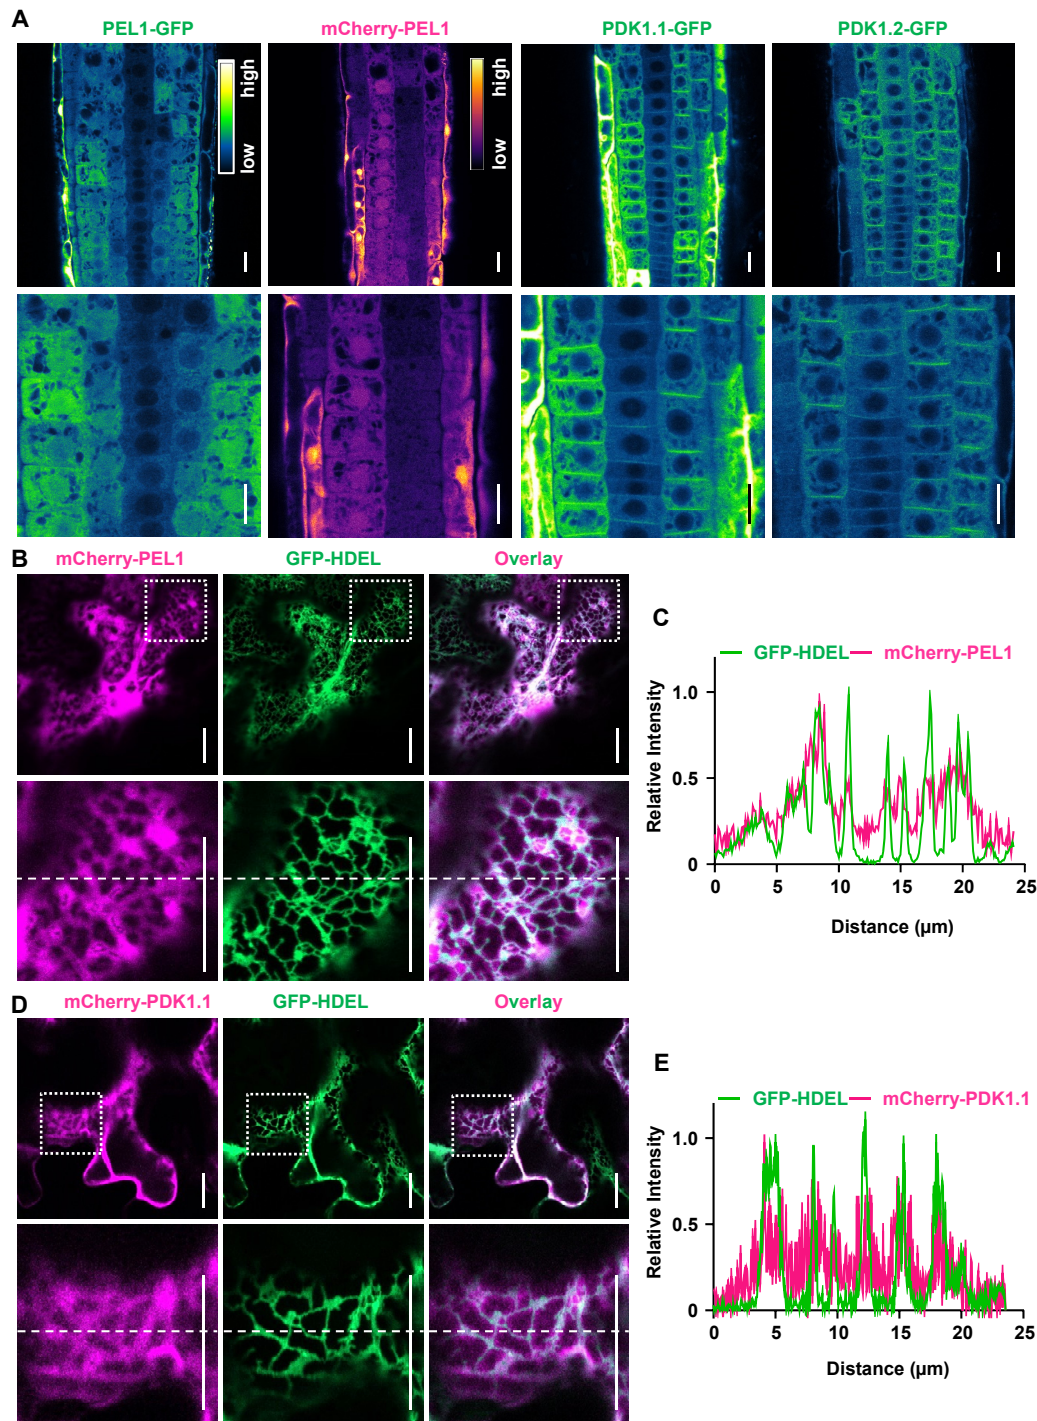

**Fig. 2 | Subcellular localizations of PEL1 and PDK1.1.**

- A. Stable transgenic lines revealed that PEL1 localized to the cytoplasm and nucleus, and that PDK1.1-GFP and PDK1.2-GFP resided at PM and cytoplasm. Five-day-old *35S::PEL1-GFP*, *35S::mCherry-PEL1*, *35S::PDK1.1-GFP* and *35S::PDK1.2-GFP* seedlings were observed by CLSM. The “Green Fire Blue” LUT was used for GFP, and “impl-inferno” LUT was used for mCherry, visualizations respectively, based on fluorescence intensity by Fiji. Scale bars, 20  $\mu\text{m}$ .
- B-E. Fluorescence observations showed that both PEL1 (b, c) and PDK1.1 (d, e) localized to certain cytoplasm compartments associated with the endoplasmic reticulum (ER). Fusion proteins PEL1-GFP (b, c) and PDK1.1-GFP (d, e) were transiently expressed with ER-specific GFP-HDEL proteins in tobacco leaves. Samples were observed 48 hours after infiltration. Scale bars, 20  $\mu\text{m}$ . Lower panels are enlarged view of the squared region of the upper panels. The position for quantification (right panels) was indicated with dashed lines across the images.

Kong et al., Figure 3

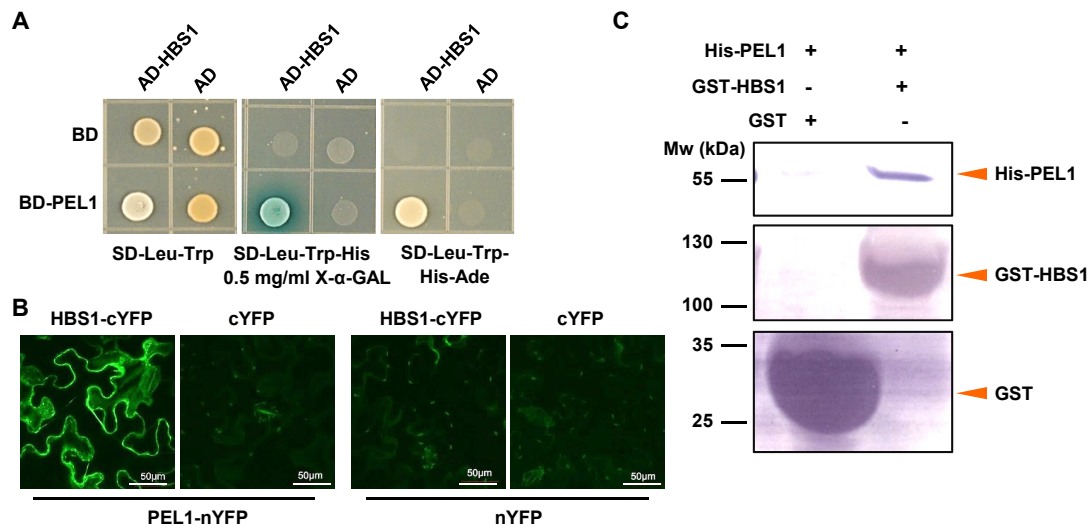

**Fig. 3 | PEL1 forms a complex with HBS1.**

A-B. Yeast two-hybrid (A) and bimolecular fluorescence complementation (BiFC, B) analysis reveals the interactions of PEL1 with HBS1. PEL1 and HBS1 was fused to GAL4 DNA-binding domain (BD) or activation domain (AD) respectively. Protein interaction was examined on synthetic dropout (-Leu/-Trp/-His) medium supplemented with 0.5 mg/ml X-α-Gal or synthetic dropout (-Leu/-Trp/-His-Ade) medium. For BiFC analysis, PEL1-nYFP or HBS1-cYFP fusion proteins were transiently expressed in *N. benthamiana* leaves through infiltration and observed. Scale bars, 50 μm.

C. GST pull-down analysis reveals the interactions of PEL1 with HBS1. GST and GST-HBS1 fusion protein were used as baits, and 6XHis-PEL1 fusion protein was used as prey. Pulled-down fractions were analyzed by Western blot using anti-His and anti-GST antibodies.

Kong et al., Figure 4

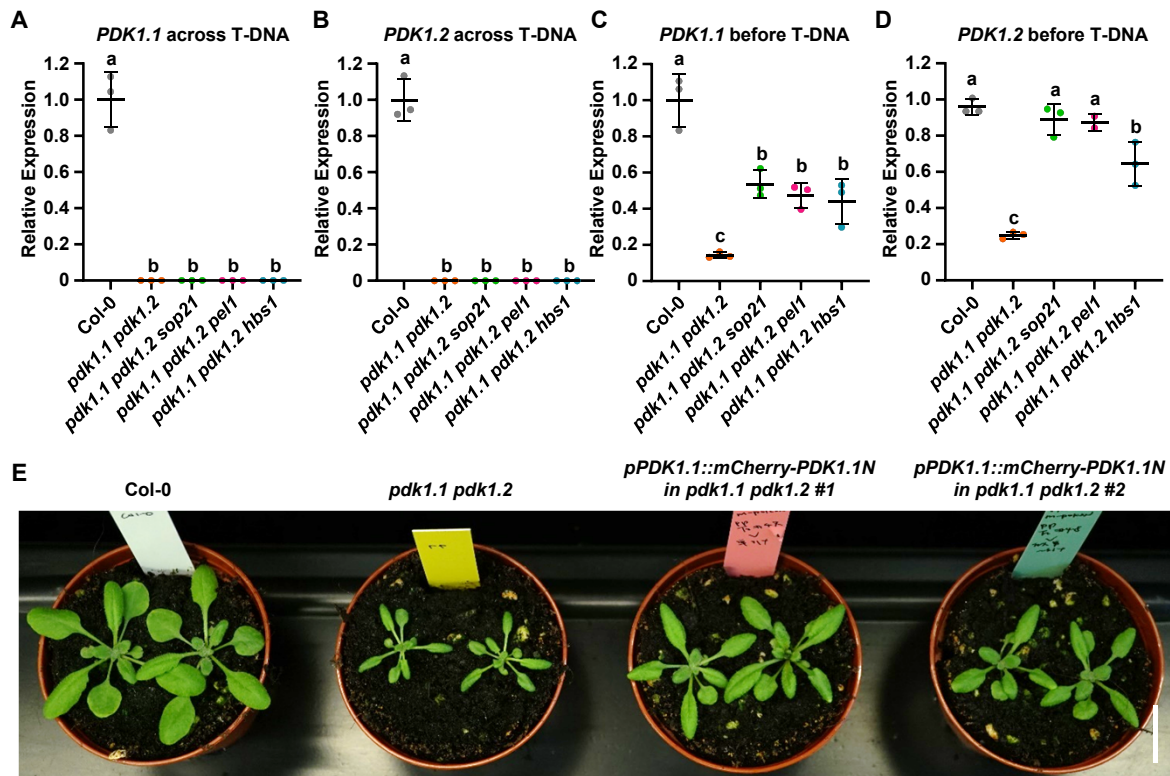

**Fig. 4 | Increased expression of truncated *PDK1* transcripts in the *pdk1.1 pdk1.2 pel1* or *pdk1.1 pdk1.2 hbs1* background accounts for the rescued phenotypes.**

A-B. RT-qPCR analysis with primers across T-DNA insertions revealed that the integrity of *PDK1.1* and *PDK1.2* full-length CDS was disrupted by the T-DNA insertions in *pdk1.1 pdk1.2*, *pdk1.1 pdk1.2 sop21*, *pdk1.1 pdk1.2 pel1* and *pdk1.1 pdk1.2 hbs1*, respectively. *ACTIN7* gene was amplified and used as an internal control. Experiments were biologically repeated 3 times and data are presented as means  $\pm$  SD. n = 3. Different letters represent significant difference,  $P < 0.05$ , by one-way ANOVA with a Tukey multiple comparison test.

C-D. RT-qPCR analysis with primers in front of T-DNA insertions revealed that N-terminal fragments of *PDK1.1* and *PDK1.2* transcripts (PDK1.1N and PDK1.2N) exhibited increased levels in *pdk1.1 pdk1.2 sop21*, *pdk1.1 pdk1.2 pel1* and *pdk1.1 pdk1.2 hbs1*, respectively, compared to that in *pdk1.1 pdk1.2*. *ACTIN7* gene was used as an internal control. Experiments were biologically repeated 3 times and data are presented as means  $\pm$  SD. n = 3. Different letters represent significant difference,  $P < 0.05$ , by one-way ANOVA with a Tukey multiple comparison test.

E. Native promoter-driven expression of PDK1 N-terminal fragment partially rescued the growth defects of *pdk1.1 pdk1.2*. A representative photo of 20-day-old Col-0, *pdk1.1 pdk1.2*, and *pPDK1.1::mCherry-PDK1.1N* (in *pdk1.1 pdk1.2*) plants grown in soil are shown. Scale bar, 2 cm.



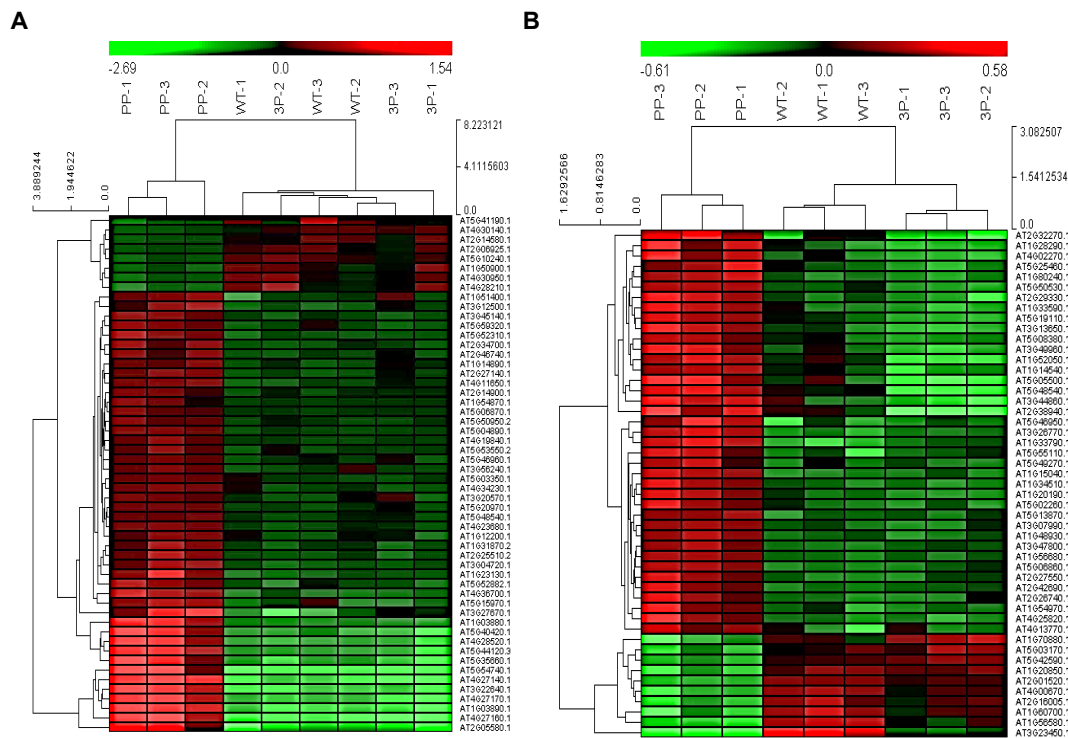

**Fig. 5 | Comparative proteomics showing the functions of PDK1 and PEL1 in shaping the whole proteomes in *Arabidopsis*.**

Heat map displayed the abundance of 54 RCEs (restored CE proteins) in shoots (A) and 49 RCEs in roots (B) of wild type Col-0, *pdk1.1 pdk1.2* and *pdk1.1 pdk1.2 pell*. “PP” refers to *pdk1.1 pdk1.2* double mutant and “3P” refers to *pdk1.1 pdk1.2 pell* triple mutant. Three independent samples of WT (WT-1, 2, 3), *pdk1.1 pdk1.2* (PP-1, 2, 3) and *pdk1.1 pdk1.2 pell* (3P-1, 2, 3) were collected and analyzed. Heat maps were generated using  $\log_2$ -transformed TMT values. Relative expression of the analyzed proteins was used to perform the hierarchical clustering analysis using Cluster3.0 (<http://bonsai.hgc.jp/~mdehoon/software/cluster/software.htm>) and Java Treeview software (<http://jtreeview.sourceforge.net>).

Kong et al., Figure 6

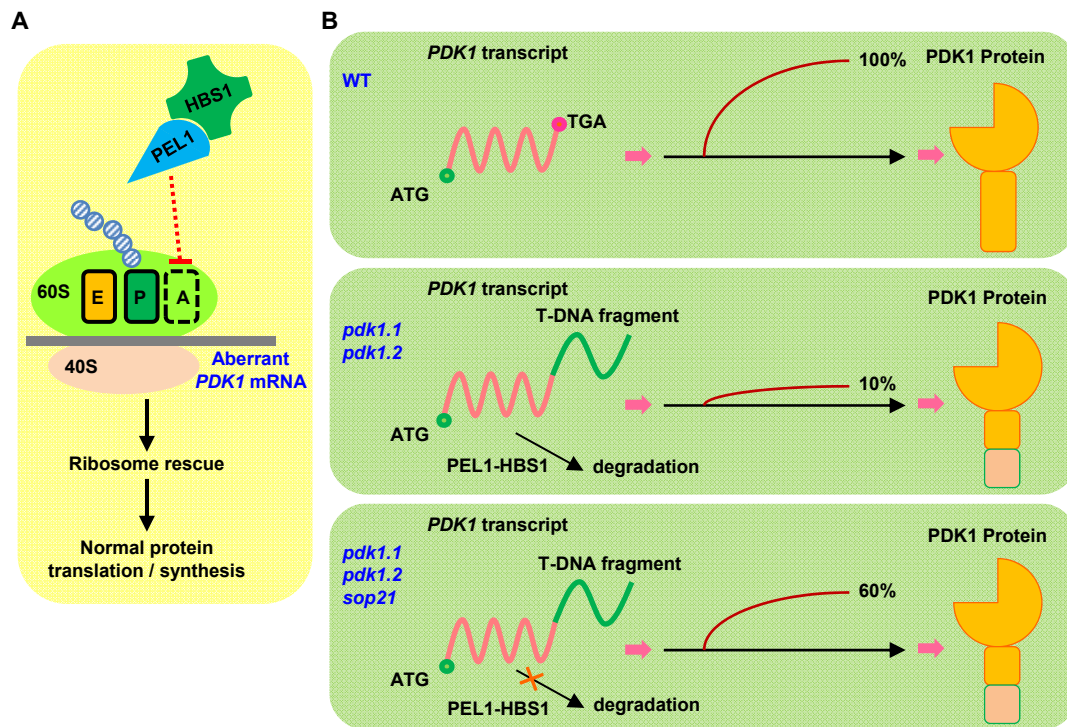

**Fig. 6 | A proposed model showing the function of PEL1-HBS1 mRNA surveillance complex and how *sop21* suppresses *pdk1.1 pdk1.2* phenotypes.**

- A. The PEL1-HBS1 complex regulates 80S ribosomes through translational surveillance to maintain the normal protein translation and plant growth. In the case of truncated *PDK1* transcripts in *pdk1.1 pdk1.2*, this complex could degrade these mRNAs without stop codon, thus promoting the recycling of stalled 80S ribosomes. A-site, ribosomal site most frequently occupied by aminoacyl-tRNA, which functions as acceptor for growing protein during peptide bond formation; P-site, ribosomal site most frequently occupied by peptidyl-tRNA, the tRNA carrying the chain of growing peptide; E-site, ribosomal site harbouring decylated tRNA on transit out from ribosome.
- B. A proposed model showing *sop21* mutation rescuing the defects of *pdk1.1 pdk1.2*: 1) In WT, the *PDK1* transcripts have the stop codon, and it can be translated into 100% of PDK1 protein. 2) In the *pdk1.1 pdk1.2* T-DNA mutants, aberrant transcripts with fusion to partial T-DNA fragment will be recognized by the PEL1-HBS1 complex and thus get degraded, exhibiting PDK1 loss-of-function mutant defects. 3) The *sop21* mutations leads to the inefficient degradation of aberrant transcripts, which produce enough truncated PDK1 protein, maintaining normal growth of *pdk1.1 pdk1.2* plants.
